1 **Genome structure predicts modular transcriptome responses to**  
2 **genetic and environmental conditions**

3

4 Stephanie Mark<sup>1</sup>, Joerg Weiss<sup>1</sup>, Eesha Sharma<sup>2</sup>, Ting Liu<sup>1</sup>, Wei Wang<sup>1</sup>, Julie M. Claycomb<sup>2</sup>,  
5 Asher D. Cutter<sup>1#</sup>

6

7 <sup>1</sup>Department of Ecology & Evolutionary Biology, University of Toronto, Toronto, ON Canada

8 <sup>2</sup>Department of Molecular Genetics, University of Toronto, Toronto, ON Canada

9 #Corresponding author: [asher.cutter@utoronto.ca](mailto:asher.cutter@utoronto.ca)

## 10 **Abstract**

11 Understanding the plasticity, robustness, and modularity of transcriptome expression to genetic  
12 and environmental conditions is crucial to deciphering how organisms adapt in nature. To test  
13 how genome architecture influences transcriptome profiles, we quantified expression responses  
14 for distinct temperature-adapted genotypes of the nematode *Caenorhabditis briggsae* when  
15 exposed to chronic temperature stresses throughout development. We found that 56% of the  
16 8795 differentially-expressed genes show genotype-specific changes in expression in response  
17 to temperature (genotype-by-environment interactions, GxE). Most genotype-specific responses  
18 occur under heat stress, indicating that cold versus heat stress responses involve distinct  
19 genomic architectures. The 22 co-expression modules that we identified differ in their  
20 enrichment of genes with genetic versus environmental versus interaction effects, as well as  
21 their genomic spatial distributions, functional attributes, and rates of molecular evolution at the  
22 sequence level. Genes in modules enriched for simple effects of either genotype or temperature  
23 alone tend to evolve especially rapidly, consistent with disproportionate influence of adaptation  
24 or weaker constraint on these subsets of loci. Chromosome scale heterogeneity in nucleotide  
25 polymorphism, however, rather than the scale of individual genes, predominate as the source of  
26 genetic differences among expression profiles, and natural selection regimes are largely  
27 decoupled between coding sequences and non-coding flanking sequences that contain *cis*-  
28 regulatory elements. These results illustrate how the form of transcriptome modularity and  
29 genome structure contribute to predictable profiles of evolutionary change.

30

31 **Keywords:** *Caenorhabditis*, transcriptome, regulatory evolution, robustness, temperature,  
32 genotype-by-environment interactions, molecular evolution

### 33 **Introduction**

34 Evolutionary adaptation to varying environmental conditions starts with genetic variability, often  
35 with alternate alleles affecting gene regulation and expression. Consequently, understanding  
36 the plasticity, robustness, and modularity of transcriptome responses to genetic and  
37 environmental conditions is crucial to deciphering how organisms adapt in nature (Ungerer *et al.*  
38 2007). Gene expression represents the most basic level at which phenotypic plasticity to a  
39 perturbation can manifest, and therefore underpins the degree of robustness of higher level  
40 phenotypes in response to the same perturbation (de Visser *et al.* 2003; Flatt 2005). Because  
41 the transcriptome changes in response both to extrinsic factors (e.g. environmental inputs) and  
42 to factors that are intrinsic to the organism itself (e.g. genetic background) (Gagneur *et al.* 2013;  
43 Grishkevich & Yanai 2013), we must consider both extrinsic and intrinsic contributions in the  
44 dynamism of genetic network composition and its genomic architecture. Consequently, it is  
45 crucial to determine how much of the genome is expressed differentially in a plastic manner with  
46 sensitivity to environmental conditions versus a genetically deterministic manner independently  
47 of environmental conditions versus a non-additive combination of both (Grishkevich & Yanai  
48 2013; Knowles *et al.* 2017). Moreover, it remains generally unclear how modular are distinct  
49 gene expression responses and what characteristics of the genome predict their composition  
50 and molecular evolution. These questions frame some of the key outstanding issues in  
51 connecting transcriptome activity to environmental heterogeneity and the molecular evolution of  
52 genomes.

53 Temperature conditions represent a pervasive extrinsic, environmental factor that influences  
54 gene expression and can help reveal the relative roles of plasticity versus robustness of  
55 transcriptome profiles (Causton *et al.* 2001; Smith *et al.* 2013). If expression plasticity is  
56 adaptive, then we expect organisms to modulate their transcriptomes under chronic  
57 developmental exposure to heat or cold stress in a coordinated way to maintain fitness.  
58 However, homeostasis may break down at environmental extremes and lead to non-adaptive  
59 changes in gene expression that simply reflect a 'broken' biological system. Pathways  
60 associated with the heat shock response are implicated in physiological buffering to acute heat  
61 stress (Lindquist & Craig 1988), but chronic sublethal heat stress may not activate this same  
62 stress response. By characterizing profiles of transcriptome change to temperature conditions,  
63 we can test the robustness of plastic responses to genetic divergence that reflects genomic  
64 evolution in the control over gene expression.

65 Allelic differences can be thought of as a kind of perturbation, a genetic perturbation, that can  
66 expose the sensitivity of gene networks in terms of expression changes (Hecker *et al.* 2009).  
67 Expression modulated by *cis*-regulatory alleles may minimize adverse pleiotropic effects and,  
68 consequently, modest effects of *cis*-regulatory SNPs might only be pronounced when they  
69 accrue over long periods of time to give rise to the kinds of expression differences that  
70 accumulate between species (Carroll 2008; Stern & Orgogozo 2008; Wittkopp & Kalay 2012).  
71 By contrast, changes to *trans*-acting regulators like transcription factors may lead to many  
72 downstream pleiotropic consequences. Consequently, large *trans*-acting effects might make up  
73 a substantial fraction of the genetic variability for gene expression differences among individuals  
74 within a species and yet rarely contribute to expression differences between species (Wittkopp  
75 *et al.* 2004; Smith & Kruglyak 2008; Stern & Orgogozo 2008; Wittkopp *et al.* 2008; Tirosh *et al.*  
76 2009), because most changes that affect fitness are deleterious and eventually get eliminated  
77 by natural selection (Keightley & Lynch 2003). The intermediate timescale of adaptive  
78 divergence between populations of the same species thus has the potential to expose whether  
79 distinct regulatory architecture must be invoked to describe transcriptome changes across the  
80 extremes of timescales from polymorphism within a single population to divergence between  
81 species.

82 In this context, extensive transcriptome analysis of the nematode *C. elegans* in response to heat  
83 shock and knock-out mutation began with microarrays (Kim *et al.* 2001), with more recent  
84 studies using recombinant inbred lines of wild strains to map polymorphic loci that contribute  
85 genotype-dependent responses to temperature (Li *et al.* 2006; Grishkevich *et al.* 2012; Snoek *et al.*  
86 2017; Snoek *et al.* 2019). For example, Li *et al.* (2006) found that among 496 detectable  
87 expression quantitative trait loci (eQTL), *trans*-eQTL were nearly 8-times as likely as *cis*-eQTL  
88 to show genotype-by-temperature responses, with subsequent study reinforcing this pattern  
89 (Snoek *et al.* 2017). Moreover, eQTL are found disproportionately on SNP-dense chromosome  
90 arms in *C. elegans* (Rockman *et al.* 2010). Grishkevich *et al.* (2012) reported that constitutively-  
91 expressed genes in *C. elegans* tend to have short intergenic regions, consistent with simple *cis*-  
92 regulatory controls, and that genes with genotype-dependent expression or genotype-by-  
93 environment interactions have longer intergenic regions, consistent with complex *cis*-regulation  
94 and a larger mutational target. It remains unknown whether natural selection might be important  
95 in shaping genetic variation in these features of *C. elegans*, and whether these properties are  
96 general across species.

97 Here we quantified transcriptome expression for *C. briggsae* nematodes from populations with  
98 distinct genetic backgrounds adapted to temperature differences associated with their origins in  
99 Tropical versus Temperate latitudes (Prasad *et al.* 2011; Stegeman *et al.* 2013; Pouillet *et al.*  
100 2015). Global collections and population genomic analyses of *C. briggsae* wild isolates from  
101 Tropical and Temperate regions show that they form distinct phylogeographic groups (Cutter *et al.*  
102 2006; Jovelin & Cutter 2011; Felix *et al.* 2013; Thomas *et al.* 2015). Given this ecological  
103 context, along with resources like recombinant inbred line (RIL) libraries and chromosome-scale  
104 genome assembly (Ross *et al.* 2011; Stegeman *et al.* 2019), *C. briggsae* represents a valuable  
105 system to understand the links between temperature and genetic background in differential  
106 gene expression. The exemplar Tropical and Temperate genotypes used as RIL parents, the  
107 focus of the present study, exhibit diverse temperature-dependent phenotypic differences  
108 consistent with adaptive differentiation of the phylogeographic groups overall, including for  
109 fecundity (~2-fold difference at 14°C, ~4-fold difference at 30°C), motility, and gamete  
110 development traits (Prasad *et al.* 2011; Stegeman *et al.* 2013; Pouillet *et al.* 2015; Stegeman *et al.*  
111 2019). By rearing these animals at hot and cold sublethal temperatures near their fertile  
112 limits, as well as under benign thermal conditions, we characterize genotypic and  
113 environmentally-induced differential gene expression across the genome. We then describe  
114 transcriptome complexity in terms of co-expression modularity to reflect transcriptome plasticity  
115 and robustness to environmental and genetic context, demonstrating distinctive genomic spatial  
116 distributions, functional attributes, and rates of molecular evolution at the sequence level.

## 117 **Materials and Methods**

### 118 ***Experimental design and sequencing***

119 To quantify the genome-wide effects of rearing temperature and genetic background on gene  
120 expression, we isolated and sequenced mRNA transcriptomes from *C. briggsae* young adult  
121 hermaphrodites of two isogenic strains (AF16 = “Tropical” strain, HK104 = “Temperate” strain)  
122 that were reared under “chronic” exposure to 14°C (~150h), 20°C (~65h), and 30°C (~48h)  
123 throughout their development from egg to adult. Previous generations of both genotypes had  
124 been raised at benign 20°C prior to establishment of eggs for rearing at the treatment  
125 temperatures following stage synchronization via standard *Caenorhabditis* sodium hypochlorite  
126 (“bleaching”) protocol (Stiernagle 1999), avoiding potential transgenerational effects of stressful  
127 temperature on gene expression. After reaching adulthood (checked for young gravid adult

128 hermaphrodites), total RNA was isolated with Trizol extraction and isopropanol precipitation (Tu  
129 *et al.* 2015) from mass isogenic cultures of each strain at each rearing temperature with three  
130 biological replicates (2 genotypes x 3 rearing temperatures x 3 replications = 18 samples). The  
131 mRNA was then separated from small RNA fractions of less than approximately 200 nucleotides  
132 using the mirVana kit from Ambion as per the manufacturer's instructions, and prepared for  
133 single-end 100bp sequencing of TruSeq libraries via Illumina HiSeq 2000 (Genome Quebec,  
134 Canada) with each of the 18 barcoded samples sequenced across 2 lanes to control for lane  
135 effects (Fang & Cui 2011).

136 We obtained an average of 51.4 million reads per sample (range: 34.5 - 73.4 million) for 925.3  
137 million total reads. Sequences are available in NCBI in project accession PRJNA509247. Over  
138 96% of reads were retained after cleaning and trimming of raw FASTQ files with Trimmomatic  
139 0.36 (894.4 million reads retained), using a seed-mismatch rate of 2, a simple clip threshold of  
140 10, discarding reads <60bp long, and trimming bases from 5' and 3' ends if they had phred33  
141 scores lower than 3 (Bolger *et al.* 2014).

#### 142 ***Read mapping and expression counts***

143 For each sample, we mapped reads to the *C. briggsae* genome (WS253) using STAR (Dobin *et*  
144 *al.* 2013), setting the maximum intron size to 5000 bp which includes 99.6% of all intron  
145 annotations in the *C. briggsae* reference genome. We applied a liberal mismatch rate of 10 to  
146 accommodate potential mapping efficacy differences between the AF16 and HK104 strains due  
147 to their genetic differences; the reference genome is based on the AF16 strain, so this liberal  
148 parameter choice minimizes the potential for mapping to bias towards the Tropical genotype  
149 that could inflate inference of differential expression due to genotype. Over 90% of the 894.4  
150 million total reads mapped to unique locations, in all samples (except one replicate of HK104 at  
151 30°C with 73.86% of 48.4 million reads mapping uniquely), with an average of 45.9 million reads  
152 mapping per sample to unique locations (Supplementary Table S1).

153 We then counted the number of reads that mapped to each exon annotated in the WS253  
154 reference genome with htseq-count (Anders *et al.* 2013) and summed over all exons in a gene  
155 to give a raw measure of expression for each gene in each sample. For our analysis, we  
156 neglected alternative splicing isoforms, treating them as contributing to expression levels for the  
157 same gene, and set the "mode" parameter in htseq-count to "intersection-nonempty" to resolve  
158 ambiguity for overlapping genes (Anders *et al.* 2013). Among mapped reads, 82-85% were

159 assigned successfully to a particular gene among the 23,267 genes annotated in the WS253 C.  
160 *briggsae* genome in all samples (again excepting one replicate of HK104 at 30°C, with 24.0  
161 million = 58% of reads assigned to genes). Among the reads that were not assigned to genes,  
162 most (9% on average) could not be associated with any exon or were counted in multiple  
163 locations (8% on average) and less than 0.1% were ambiguous.

## 164 ***Differential expression analysis***

165 We first visualized gene expression counts in a Multi-Dimensional Scaling (MDS) plot  
166 (Nikolayeva & Robinson 2014), which showed strong clustering of most biological replicates  
167 within a treatment and differentiation among treatments (Supplementary Figure S1). We then  
168 retained only the subset of genes with at least 1 cpm (gene read count per million; using the  
169 “cpm” function in edgeR (Robinson *et al.* 2010)) in 3 or more libraries (i.e. in one biological  
170 replicate) to exclude 7068 genes with extremely low expression that could bias downstream  
171 analysis. It is possible that the genes filtered out at this step might exhibit higher expression at  
172 different developmental stages, males, or alternative environmental conditions than those  
173 assessed here. To test for statistical evidence of differential expression, we next transformed  
174 the expression counts using limma and voom, which performs well in controlling Type I error  
175 and in detecting true positives (Smyth 2005; Law *et al.* 2014; Ritchie *et al.* 2015). Preliminary  
176 analysis (not shown) found limma to be more conservative than edgeR for our dataset, so we  
177 elected to use limma for downstream analysis. Upon applying the voom transformation from the  
178 limma package to the remaining set of 16,199 genes, a Q-Q plot showed that the data closely  
179 approximated a normal distribution (Supplementary Figure S1).

180 We then tested these 16,199 genes for differential expression using limma by fitting a linear  
181 model to the expression profile for each gene as:  $\text{expression} \sim \text{strain} + \text{temperature} +$   
182  $\text{strain} * \text{temperature}$  interaction. We first tested for significance of the interaction term, and then  
183 tested for significance of the main effect terms only if the interaction was non-significant. The  
184 model intercept was set as expression for the Tropical strain at 20°C and P-values were  
185 adjusted for multiple testing using the Benjamini-Hochberg correction with significance inferred  
186 for a false discovery rate (FDR) of 0.05 (Benjamini & Hochberg 1995). To distinguish which  
187 genes responded to hot versus cold rearing conditions for genes with a significant effect of  
188 temperature (either main effect or interaction effect), we performed post-hoc tests on the  
189 individual temperature coefficients (FDR = 0.05). We then classified genes into five mutually  
190 exclusive categories based on whether they showed significant differential expression due to

191 genotype (strain) only (“G only” genes), temperature only (“T only” genes), both genotype and  
192 temperature as independent main effects (i.e. additive effects; “G&T” genes), a non-additive  
193 interaction between genotype and temperature (“GxT” genes), or no differential expression (“no  
194 DE” genes).

### 195 ***Co-expression clustering of gene expression profiles***

196 To capture distinct stereotypical profiles of gene expression differences in response to our  
197 temperature and genotype treatments, we performed a co-expression clustering analysis using  
198 the Weighted Gene Correlation Network Analysis (WGCNA) package (Langfelder & Horvath  
199 2008). Because WGCNA works best with normally distributed expression values, we again used  
200 the voom-transformed expression values for the 16,199 filtered genes. A preliminary  
201 hierarchical clustering analysis of the samples rejected batch effects as a source of  
202 heterogeneity among samples, instead identifying both genotype and temperature as likely and  
203 biologically interesting sources of variation in the data (Supplementary Figure S1). We  
204 determined the best soft-thresholding power parameter for our data to be 30 ( $R^2$  correlation with  
205 a scale-free network topology = 0.75) based on fits across a range of values from 1 to 42  
206 (Supplementary Figure S2), which also yielded an acceptable level of mean connectivity ( $k =$   
207 115), which is central to the assumptions of the WGCNA model (Zhang & Horvath 2005).

208 Running WGCNA yielded 124 initial clusters of genes with similar patterns of expression, which  
209 we consolidated further by merging similar modules, defined as those with a correlation of 0.75  
210 or higher with each other (Supplementary Figure S2). This procedure produced 22 co-  
211 expression modules plus one pseudo-module (M0) containing the 37 genes that could not be  
212 grouped based on expression pattern. The characteristic expression profile of genes in a  
213 module is represented by WGCNA as the first principal component in expression space, termed  
214 the “module eigengene” (Langfelder & Horvath 2007), which we plotted for each genotype  
215 separately as the module eigengene expression values averaged across the three biological  
216 replicates as a function of rearing temperature.

217 We performed statistical overrepresentation tests of Gene Ontology (GO) terms associated with  
218 gene lists of each co-expression module using PANTHER (Mi *et al.* 2010), using all four  
219 PANTHER lists available for *C. briggsae*: Pathways, GO-slim Molecular Function, GO-slim  
220 Biological Process, and GO-slim Cellular Components. P-values were adjusted for multiple  
221 testing with the Bonferroni correction.



## 222 **Genomic enrichment analysis**

223 *C. briggsae* chromosomes are defined by distinct recombination domains (high recombination  
224 arms, low recombination centres, and small tip regions with little detectable recombination),  
225 which also correlate with the density of coding genes, repetitive elements and single nucleotide  
226 polymorphism (SNPs) (Hillier *et al.* 2007; Ross *et al.* 2011; Thomas *et al.* 2015). We therefore  
227 tested whether gene profiles of differential expression or module affiliation were enriched in  
228 particular chromosomal regions using Bonferroni-adjusted G-tests, defining arm-center  
229 boundaries as in Ross *et al.* (2011). Analyses of upstream intergenic lengths were log-  
230 transformed prior to analysis with ANOVA, excluding genes with overlapping positions in the  
231 genome annotation. We used the transcription factor gene designations from (Haerty *et al.*  
232 2008). We also cross-referenced differential expression categories and co-expression module  
233 membership with Wormbase-defined *C. elegans* orthologs found have sex-biased differential  
234 expression by Ortiz *et al.* (2014), which we used to test for enrichment with G-tests.

## 235 **SNP and molecular evolution analysis**

236 Genotype-dependent differences in expression could result from allelic differences in the local  
237 vicinity of genes (*cis*-acting effects; e.g. variants in promoter or nearby enhancer elements) or in  
238 distant regulators (*trans*-acting effects; e.g. variants in the regulation or functional sequence of  
239 transcription factors or miRNAs) (Rockman & Kruglyak 2006). The allelic differences  
240 contributing to local *cis*-acting regulation are likely to occur in the upstream promoter regions for  
241 those genes showing genotype-dependent expression (Grishkevich *et al.* 2012), though there  
242 are additional important roles of downstream and intronic regulatory elements in gene  
243 expression (Merritt *et al.* 2008). Therefore, we quantified the incidence of single-nucleotide  
244 polymorphisms (SNP) between the AF16 and HK104 genomic backgrounds in 500bp upstream  
245 and downstream flanking regions of coding sequences, as promoter regions tend to be in close  
246 proximity to coding sequences in *Caenorhabditis* (Saito *et al.* 2013).

247 We called single nucleotide variants between AF16 and HK104 based on Illumina paired-end  
248 sequencing of HK104 to ~33x coverage using identical methods of Thomas *et al.* (2015),  
249 yielding 761,531 SNPs and 173,341 indels. Sequences are available in NCBI in project  
250 accession PRJNA509247. We calculated the per-bp density of SNPs ( $\pi$ ) in the pairwise  
251 comparison of AF16 and HK104 in a 500bp window upstream (and downstream) of coding  
252 sequences, excluding genes internal to operons (and using just the 5'-most or 3'-most operon  
253 gene for upstream or downstream sequence, respectively). 1070 operons comprising 2573

254 genes were identified based on orthology and synteny with annotated *C. elegans* operons, as in  
255 Tu et al. (2015). We also calculated the per-bp incidence of SNPs for different genomic features  
256 on a per-gene basis, including non-synonymous sites, synonymous sites, and introns, in  
257 addition to the 500bp flanking regions, after masking non-covered and low-quality sites. The  
258 effective number of codons (ENC) metric of biased codon usage was calculated for each gene  
259 in the *C. briggsae* reference genome WS253 with codonw (J. Peden,  
260 <http://codonw.sourceforge.net>). We used 6911 coding sequence divergence values (dN/dS') for  
261 1-1 orthologs between *C. briggsae* and *C. nigoni* from Thomas et al. (2015).

## 262 **Results**

### 263 ***Widespread genotype- and temperature-dependent differential gene expression***

264 We tested for differential expression across the *C. briggsae* transcriptome in response to three  
265 rearing temperature conditions and two genotypes, based on gene expression quantification  
266 from 45.7 million uniquely-mapped RNA sequence reads for each triplicate sample on average  
267 (824 million total mapped reads; Supplementary Table S1). Over half (54%, n=8795) of *C.*  
268 *briggsae* genes analyzed showed significant differential expression due to genotype,  
269 temperature, or both (16,199 genes tested after quality filtering for the genome's 21,827  
270 annotated coding genes). The majority of these genes had a significant genotype-specific  
271 response to temperature (n=4919 "GxT genes"; 56% of 8795 differentially expressed genes;  
272 30.4% of all genes analyzed; Supplementary File S1) (Figure 1A). In contrast to this "complex"  
273 GxT pattern, the remaining 3876 differentially expressed genes exhibited a "simple"  
274 dependence on genotype, temperature, or additive effects of both (8.8% "G genes", n=770; 23%  
275 "T genes", n=1987; 13% "G&T genes", n=1119 genes). Although 64% more genes overall  
276 exhibited a simple plastic response to temperature than a deterministic response to genotype  
277 (1987 + 1119 = 3106 vs 770 + 1119 = 1889), the abundance of genes with a complex GxT  
278 interaction of both factors highlights the important roles of both environmental plasticity and  
279 genetic determinism in transcriptome profiles (Figure 1A).

### 280 ***Distinct genetic responses to chronic heat versus cold stress***

281 Genes with expression influenced by chronic cold stress (14°C) responded differently than  
282 genes affected by chronic heat stress (30°C) in terms of the number of genes involved, whether  
283 genes increased or decreased expression, and the magnitude of expression change. In

284 particular, cold stress affected expression of 74% of those genes with simple effects of  
285 temperature relative to benign conditions at 20°C (2308 of the 3106 T and G&T genes),  
286 whereas it was heat stress that altered expression of the plurality of GxT genes (2393 of 4919  
287 genes, 49%) (Figure 1B). Among all these genes that responded to temperature in some way,  
288 more genes showed reduced expression at cool temperatures and elevated expression at warm  
289 temperatures, compared to benign conditions (Figure 1C; 1.05-fold reduction for T plus G&T  
290 and 1.3-fold reduction for GxT at 14°C, 6.8-fold elevated for T plus G&T and 1.2-fold elevated  
291 for GxT at 30°C). In terms of the magnitude of differential expression, chronic cold and heat  
292 stress were similar for genes with simple expression dynamics (T and G&T genes; Figure 1D;  
293 6.1 to 6.5-fold increase for heat and cold; 3.0 to 3.7-fold decrease for heat and cold). The  
294 magnitudes of elevated expression change for GxT genes, however, were much larger under  
295 chronic heat stress than under chronic cold stress (hot 8.57-fold vs. cold 3.73-fold increase).  
296 Reciprocally, GxT genes that decreased expression under chronic cold stress had a larger  
297 magnitude change than under chronic heat stress (hot 6.50-fold vs. cold 9.19-fold decrease).  
298 These observations support the idea that distinct genetic networks mediate response to cold  
299 versus heat stress, rather than control by a single shared temperature stress response.

### 300 ***Co-expression modules define gene sets with distinct sensitivities to temperature*** 301 ***and genotype***

302 We defined 22 co-expression clusters in the *C. briggsae* transcriptome with WGCNA to capture  
303 modules showing distinctive patterns of differential gene expression in response to temperature  
304 and genotype differences (Figure 2, Figure 3, Supplementary File S1). The stereotypical  
305 expression profile for genes in each co-expression module is represented by its “module  
306 eigengene,” defined by the first principal component in expression space (Figure 3). These  
307 eigengene profiles illustrate how a given module reflects a dominant trend of genotype-  
308 dependence (e.g. M10), temperature-dependence (e.g. M12), additive effects of genotype and  
309 temperature (G&T, e.g. M4), or genotype-specific sensitivity to temperature (GxT, e.g. M22)  
310 (Figure 3). An average of 46% of genes in a module showed individually-significant differential  
311 expression, ranging from a low of just 6% (M13) to a high of 84% (M15) (Figure 3,  
312 Supplementary Figure S3). Genes with temperature- and genotype-specific differential  
313 expression are concentrated within distinct subsets of modules (Figure 3). Moreover, modules  
314 differ in sequence characteristics and in their enrichment with sex-related differential gene  
315 expression, as described below.

### 316 **Rapid molecular evolution in modules sensitive to genotype or temperature alone**

317 Genotype-dependent expression profiles predominate in just two modules (M7 and M10), which  
318 together include 44% (n=342) of all 770 genes with significant ‘genotype-only’ differential  
319 expression. Their eigengene expression profiles show limited dynamics across temperatures,  
320 with expression for the Temperate HK104 genotype consistently higher than Tropical AF16 in  
321 M7 and consistently lower in M10 (Figure 3). M10 is enriched for gene ontology (GO) terms  
322 related to extracellular constituents (Supplementary File S2). GO term enrichment in M7  
323 indicates disproportionate representation of genes with nervous system function, including 11  
324 GABA and 11 acetylcholine receptor activity genes, such as the ortholog of *C. elegans* nicotinic  
325 acetylcholine receptor *acr-9*. This nervous system enrichment of M7 is salient due to the HK104  
326 and AF16 strains of *C. briggsae* differing in rearing-dependent thermal taxis and locomotion  
327 (Stegeman *et al.* 2013; Stegeman *et al.* 2019), a suite of behaviors under neural control.

328 Genes in module M10 have several other special features compared to other modules: rapidly-  
329 evolving protein coding sequences (high dN/dS’), high density of SNPs in replacement sites  
330 despite lowest SNP density in introns, the highest enrichment in arm regions of autosomes,  
331 enrichment on the X-chromosome, and exceptional rarity in operons (Figure 4, Figure 5A). We  
332 observed that genes in M10 also have the least consistent expression among replicates, with  
333 very few gene members having orthologs with “oogenic” expression according to Ortiz *et al.*  
334 (2014) (Figure 4A; Figure 5A). These features imply weaker canalization of expression of genes  
335 in M10, reflecting either weaker purifying selection or perhaps recent adaptive divergence in  
336 average expression levels that has not yet fine-tuned expression variability.

337 By contrast to the pronounced genotype-dependent differential expression in modules M7 and  
338 M10, two other modules each were comprised of >50% ‘temperature-only genes’ (M12, M15),  
339 although they accounted for just 12% (n=247) of the 1987 total T-only gene set (Figure 3). In  
340 both modules, eigengene expression is highest at high rearing temperatures across genotypes  
341 (Figure 3). In addition, modules M6 and M4 also contained a large fraction of temperature-only  
342 genes, and as large modules they also contain a large count of such genes (Figure 3). Modules  
343 M12 and M15 have genes with the highest average rates of evolution (dN/dS’) and that occur  
344 only rarely in operons (Figure 5). They also have among the lowest average expression levels  
345 and codon usage bias (Figure 5A). Module M12 is highly enriched (3.7-fold) for orthologs with  
346 an oogenic gene classification in *C. elegans* (Ortiz *et al.* 2014), whereas M15 is depleted of  
347 such genes by having 2.6-fold fewer than expected (Figure 4A). Module M12 GO terms show

348 enrichment for genes associated with chromatin, like the ortholog of *C. elegans cec-7*, but with  
349 just 8 such genes of the 245 in M12, it is unclear how distinctive a property this is. More  
350 enigmatically, M15 shows no GO term enrichment, providing little clue as to whether these heat-  
351 sensitive and rapidly-evolving genes act in related functional pathways (Supplementary File S2).

### 352 ***Sperm gene function associated with both temperature- and genotype-*** 353 ***dependence***

354 Two co-expression modules were especially enriched in genes with additive effects of both  
355 genotype and temperature (M4, M5; G&T genes), accounting for over half (56%) of all such  
356 genes genome-wide (Figure 3). Their eigengene profiles show high expression at low  
357 temperatures, with the Tropical AF16 genotype having consistently higher expression than  
358 Temperate HK104 in M5 and vice versa for M4 (Figure 3). Interestingly, we found that module  
359 M5 is 3.3-fold enriched for orthologs of “spermatogenic” genes from Ortiz et al. (2014), a level  
360 unlike any other module (Figure 4A). Genes in M5 also are rare on the X-chromosome and  
361 nearly absent from operons, as expected for sperm-related genes (Reinke et al. 2000; Reinke &  
362 Cutter 2009; Albritton et al. 2014), and with fewer transcription factors (TFs) than most modules  
363 (Figure 4B; Figure 5A). Moreover, GO term enrichment in M5 indicates a prominent role of  
364 genes with phosphatase/kinase activity and glycogen metabolism (Supplementary File S2),  
365 including the orthologs of *C. elegans gsp-3/4* and *aagr-1*. Previous expression studies have  
366 reported male-biased and sperm-related genes to be enriched for genes with  
367 phosphatase/kinase GO terms (Reinke et al. 2004; Thomas et al. 2012), and some  
368 glycoproteins play crucial roles in sperm competitiveness in *C. briggsae* (Yin et al. 2018). Sperm  
369 fertility is known to show temperature sensitivity differently between the AF16 and HK104  
370 genotypes of *C. briggsae* (Prasad et al. 2011; Pouillet et al. 2015). Thus, the M5 expression  
371 pattern implies that universally higher expression for a suite of sperm-related genes, rather than  
372 a GxT profile, is associated with the greater sperm fertility at high temperatures observed in the  
373 AF16 genetic background.

### 374 ***Modules enriched for GxE and non-differential expression involved in core*** 375 ***biological processes***

376 Eight modules contained an especially large set of GxT genes (M1, M2, M3, M9, M14, M16,  
377 M18, M22), indicating a prominent influence of genotype-specific responses to temperature  
378 (Figure 3). These eight modules accounted for 71% (n=3477) of all GxT genes genome-wide.

379 The eigengene profiles for four of them show dramatic ‘crossing reaction norms’ such that the  
380 Temperate HK104 and Tropical AF16 genotypes exhibit opposite expression responses to  
381 rearing temperature (M9, M14, M18, M22; Figure 3). The known genotype-dependence in *C.*  
382 *briggsae* for how sensitive oogenesis is to temperature, with strong reductions of mitotic and  
383 meiotic cell counts in the gonad of HK104 animals (Pouillet *et al.* 2015), suggests prime  
384 candidates among the GxT genes in M9 that has 2.7-fold enrichment for orthologs with oogenic  
385 roles (Ortiz *et al.* 2014) (Figure 4A). The other four modules show a much more exaggerated  
386 eigengene expression response for just one of the genotypes specifically under high 30°C  
387 conditions (M1, M2, M3, M16; Figure 3), rather than crossing reaction norms.

388 GO terms for core biological processes like mitochondria-related, ribosome-related, and/or  
389 translation-related function are enriched in M14, M18 and M22, with M1, M2 and M9 enriched  
390 for chromatin and transcription-related GO terms (Supplementary File S2). Genes in modules  
391 M18 and M22 also are enriched for orthologs of “sex neutral” genes (Ortiz *et al.* 2014), are  
392 enriched in operons, and include few TFs (Figure 4A; Figure 5A). Consistent with these  
393 modules involving core biological functions, we also observed the distinctive features of M18  
394 and M22 in having genes with the highest average expression and strongest codon usage bias,  
395 while also having the strongest protein sequence conservation (lowest dN/dS’) and the lowest  
396 incidence of replacement-site SNPs (Figure 5; Supplementary Figure S5).

397 The seven remaining co-expression modules consisted primarily of genes that lacked  
398 individually significant differential expression, though their module eigengene profiles  
399 nevertheless suggest important effects of genetic background and temperature on the  
400 stereotypical expression profile (M8, M11, M13, M17, M19, M20, M21). Several of these  
401 modules showed GO term enrichment for various metabolic processes (M8, M11, M17, M21)  
402 and transcriptional or translational functions (M8, M11, M13, M20). Among these modules, M8,  
403 M19 and M20 are extremely enriched for orthologs of “oogenic” genes from Ortiz *et al.* (2014),  
404 but include very few operonic genes (Figure 4A; Figure 5A). M20 also has the highest incidence  
405 of TFs (29%) among all co-expression modules, has low average expression, and is enriched  
406 for genes on autosomal arms and on the X-chromosome (Figure 4, Figure 5A, Supplementary  
407 Figure S5). Genome-wide, TFs are more likely to show no differential expression than other  
408 kinds of genes (no DE for 54.5% of TFs vs. 45.2% of other genes; G-test  $\chi^2=29.2$ ,  $P<0.0001$ ).  
409 Module M21 is distinctive in having the highest incidence of genes in operons (60.4%), which  
410 are extremely rare on autosomal arms and the X-chromosome (Figure 4, Figure 5A). The 96  
411 genes in M21 have extremely consistent expression across replicates, with most showing no

412 individually-significant differential expression due to either temperature or genotype (Figure 3;  
413 Figure 5A). In *C. elegans*, these features are typical of genes that are expressed constitutively  
414 across development (Cutter *et al.* 2019).

### 415 **Genomic position and differential gene expression**

416 We hypothesized that genomic architectural and molecular evolutionary features might lead to  
417 local enrichment of genes with genotype-dependent differential-expression. For example, SNP  
418 variation is greater in the high recombination arm domains of autosomes in *C. briggsae*  
419 (Thomas *et al.* 2015), and the X-chromosome exhibits a variety of distinctive features compared  
420 to autosomes (Ross *et al.* 2011; Cutter 2018). Therefore, we tested for non-random distributions  
421 of differentially-expressed genes along chromosomes and between chromosomes. We found  
422 that autosome arm domains contained 22% more genes with genotype-dependent expression  
423 than expected by chance, and also were slightly enriched for GxT genes (1.04-fold; Figure 1B).  
424 Chromosome arms of *C. elegans* also have been reported to contain a disproportionate  
425 representation of genes with genotype-dependent differential expression (Denver *et al.* 2005;  
426 Rockman *et al.* 2010; Grishkevich *et al.* 2012). By contrast, it was center domains that  
427 contained 15% more G&T genes than expected (Figure 1B). Temperature-only genes and  
428 genes with no differential expression were randomly distributed between arm and center  
429 domains (Figure 1B). Among the 22 co-expression modules, we observed 9 modules to have  
430 significant enrichment in arms and 5 enriched in center domains of autosomes (Figure 4B).  
431 Thus, gene expression profiles are not spatially independent and genome structural features  
432 yield predictable patterns of differential expression within and between chromosomes.

433 We also found the X-chromosome to be enriched for genes with significant differential  
434 expression due to genetic background (G-only genes) as well as for genes with no individually-  
435 significant differential expression (X under-representation for G&T and GxT genes; Figure 1B).  
436 X-linked biases also held true for co-expression modules (X enriched for 8 modules, autosomes  
437 enriched for 8 modules; Figure 4B). Genes from module M21, in particular, are virtually absent  
438 from the X-chromosome (Figure 4B), likely associated with the prevalence of operon genes in  
439 this co-expression module that also tend to be exceptionally rare on the X-chromosome  
440 (Blumenthal *et al.* 2002; Reinke & Cutter 2009). Chromosomes II and IV were distinctive in  
441 having no module with significant enrichment or under-enrichment of genes (Supplementary  
442 Figure S4). Other autosomes, however, were especially enriched (or under-enriched) for genes  
443 in particular modules, for example, genes from M21 were 2.3-fold enriched on Chromosome III

444 and genes from M16 were 2.0-fold enriched on Chromosome V (Supplementary Figure S4).  
445 Given the extreme enrichment on Chromosome V for M16 and its genotype-specific expression  
446 response at 30°C (Figure 3), it is notable that a quantitative trait locus (QTL) mapping study in  
447 *C. briggsae* found QTL on Chromosome V to control differences in heat-sensitive movement  
448 behaviors (Stegeman *et al.* 2019).

449 In *C. elegans*, loci with genotype-dependent expression tend to have longer upstream intergenic  
450 regions, interpreted as being consistent with more complex *cis*-regulation of these genes  
451 (Grishkevich *et al.* 2012). We observed a similar pattern in *C. briggsae*, with median upstream  
452 length of 1367bp for G-only genes versus 1074bp for T-only genes (ANOVA  $F_{4,15414}=5.84$ ,  
453  $P<0.0001$ , Tukey post-hoc tests on log-transformed upstream intergenic length show G-only >  
454 T-only). After partitioning the genomic locations of differentially-expressed genes to account for  
455 their non-random distributions in the genome, however, we found that only those G-only genes  
456 in autosomal centers have significantly longer upstream intergenic regions compared to T-only  
457 genes (arms ANOVA  $F_{4,5653}=0.10$ ,  $P=0.98$ ; centers  $F_{4,6410}=5.50$ ,  $P=0.0002$ , Tukey post-hoc tests  
458 on log-transformed upstream intergenic length show G-only > T-only). However, genes in  
459 autosomal centers with no differential expression also had longer upstream intergenic lengths  
460 than T-only genes and were not significantly different in length to GxT genes or G&T genes. We  
461 also find significant variation among co-expression modules in upstream intergenic length (arm  
462 ANOVA  $F_{22,5635}=13.59$ ,  $P<0.0001$ ; center ANOVA  $F_{22,6392}=15.48$ ,  $P<0.0001$ ), but observe no  
463 clear trend between length and the relative composition of genotype- or temperature-dependent  
464 genes. Thus, our analysis of *C. briggsae* upstream length distributions does not strongly support  
465 the notion that loci with genotype-dependent differential expression have more complex *cis*-  
466 regulatory controls.

### 467 **Genome structure drives SNP associations with differential expression**

468 We quantified the incidence of single-nucleotide polymorphisms (SNP) for the 761,531 SNPs  
469 between the AF16 and HK104 genomic backgrounds in 500bp upstream and downstream  
470 flanking regions of coding sequences, as promoter regions tend to be in close proximity to  
471 coding sequences in *Caenorhabditis* (Saito *et al.* 2013). We found zero upstream SNPs for  
472 26.2% of the 16,167 genes that had expression and genomic coverage in both AF16 and  
473 HK104 (23.0% G-only, 30.9% G+T, 25.6% GxT). Such genes should have no role for *cis*-acting  
474 SNPs, suggesting this value as a lower-bound estimate for the incidence of entirely *trans*-acting  
475 regulatory differences that may alter genotype-dependent expression. Moreover, of



476 differentially-expressed genes affected by genotype, 32.6% have zero downstream SNPs,  
477 20.3% have zero intronic SNPs, and 18.6% have zero SNPs in the coding sequence, also  
478 consistent with a major role of *trans*-regulatory control being responsible for the genotype-  
479 dependence of differential expression. Consistent with this idea, *C. elegans* shows a  
480 predominant role of *trans*-regulatory control in genotype-dependent differential expression to  
481 acute heat stress (Snoek *et al.* 2017).

482 We further predicted that an important role of *cis*-acting SNPs would be most evident by their  
483 enrichment in association with G-only genes (as well as G&T genes and GxT genes), whereas  
484 SNPs would be underrepresented in genes with no differential expression or T-only profiles.  
485 Genome-wide, we did observe significant differences among differential expression categories  
486 in the incidence of SNPs in upstream (ANOVA  $F_{4,16141}=7.63$ ,  $P<0.0001$ ), downstream  
487 ( $F_{4,16141}=4.75$ ,  $P=0.0008$ ), and intronic portions of coding genes ( $F_{4,16141}=7.82$ ,  $P<0.0001$ ).  
488 Overall, G-only genes have significantly higher SNP densities than other expression classes at  
489 replacement sites, synonymous sites, introns and flanking sequences and genes with a GxT  
490 pattern of differential expression had a greater density of SNPs than T-only genes only in  
491 introns. These results mirror the report by Grishkevich *et al.* (2012) for *C. elegans* that SNPs are  
492 enriched in promoters of genes with genotype-dependent differential expression.

493 Our findings therefore superficially support the idea of a key role for *cis*-acting SNPs controlling  
494 genotype-dependent differential expression. However, we observed that this trend is driven  
495 primarily by the enrichment of G-only genes in chromosome arms (Figure 1B), where SNPs are  
496 disproportionately abundant for both functionally-constrained and unconstrained sites (Thomas  
497 *et al.* 2015). When we account for genomic region, SNP density remains elevated for G-only  
498 genes among genes in autosomal centers but not in arms (ANOVA  $F_{4,6729}=3.60$ ,  $P=0.0062$ , G-  
499 only > other gene classes with Tukey HSD post-hoc test; Figure 5C). Thus, genome structure is  
500 an important determinant of inferences about *cis*-acting regulators of genotype-dependent  
501 differential expression. We hypothesize that the SNPs in upstream regions of genes in the “SNP  
502 deserts” of chromosome centers are more likely to represent causal regulatory variants that  
503 modulate gene expression.

504 ***Molecular evolution is decoupled between coding and regulatory sequence***  
505 ***regions***

506 Replacement-site SNPs are rarest in the coding sequences of non-differentially expressed  
507 genes (in both chromosome arms and centers), consistent with these genes having strongest  
508 selective constraint that most effectively eliminates new mutations (Figure 5C). Weaker  
509 selective constraint among genes with genotype-dependent differential expression that allows  
510 mutations to accumulate could result in their excess of coding SNPs. However, replacement-site  
511 divergence between species, which reflects a longer timescale of evolution, is no different  
512 between G-only genes and non-differentially expressed genes (median G-only  $dN/dS' = 0.0580$ ,  
513 no DE  $dN/dS' = 0.0511$ ; no significant difference from Tukey's post-hoc test on log-transformed  
514 values). These contrasting patterns for the scale of divergence between phylogeographic  
515 groups and between species suggest that relaxed selection on G-only genes might be  
516 evolutionarily recent or that adaptive divergence between Temperate and Tropical  
517 phylogeographic groups of *C. briggsae* contribute disproportionately to loci with genotype-  
518 dependent differential expression.

519 Consistent with the idea that genes and modules with many SNPs are subject to weaker  
520 selective constraints, co-expression modules with high average coding SNP density have low  
521 average expression and weak codon usage bias (Figure 5A; Figure 5B; Supplementary Figure  
522 S5). Associations were weaker for non-coding flanking regions (Supplementary Figure S5).  
523 Modules M10, M16, M12 and M15 were most enriched for coding SNPs (Figure 5B), also  
524 exhibiting among the lowest average expression and codon bias. Modules with high coding SNP  
525 density also show high long-term molecular evolutionary divergence between species ( $dN/dS'$ ;  
526 Figure 5B), further implicating their constituent genes being subject to weaker selective  
527 constraints, or potentially, a greater incidence of adaptive divergence.

528 Finally, we tested for molecular evolutionary correspondence between coding and non-coding  
529 sequence. First, we found that SNPs and interspecies divergence correlate positively across  
530 genes for replacement sites, consistent with concordant pressures of purifying selection at both  
531 short and long evolutionary timescales on coding sequences (log-transformed  $\pi_{\text{non-synonymous}}$  and  
532  $dN/dS'$ ,  $F_{1,5741} = 646.7$ ,  $P < 0.0001$ ). However, interspecies divergence in coding sequence did  
533 not correlate with SNP density in non-coding sequences (Supplementary Figure S6). When we  
534 analyzed average values for co-expression modules instead of per-gene values, however, we  
535 observe positive correlations of non-coding SNP density with both coding SNPs and  
536 interspecies divergence (Supplementary Figure S6), suggesting that the distinct gene contents  
537 and genomic locations of genes among modules partly contributes to the coding-noncoding  
538 correspondence at the module level. Overall, these observations support the idea that selection

539 pressures are largely decoupled between coding sequences and non-coding flanking  
540 sequences that contain regulatory elements.

### 541 ***Muted differential expression role among heat shock proteins***

542 We hypothesized that if heat shock proteins (hsp) modulate transcriptomic responses to chronic  
543 temperature stress then we would detect disproportionate differential expression for hsp genes.  
544 Of the 24 hsp genes in our expression dataset, only 8 showed significant differential expression,  
545 which is less than the genome overall (33% vs. 54%; G-test  $\chi^2 = 4.267$ ,  $df = 1$ ,  $P = 0.039$ ), and  
546 similar to the genome in differential expression categories (Fisher Exact Test,  $P = 0.35$ ). This  
547 suggests that hsp genes may play a lesser role in temperature stress experienced chronically  
548 across development, despite their profound importance to maintaining homeostasis in the face  
549 of acute heat stress (Lindquist & Craig 1988); even with acute heat shock, however, few genes  
550 show consistent upregulation in *C. elegans* (GuhaThakurta *et al.* 2002).

## 551 **Discussion**

552 The *C. briggsae* transcriptome shows widespread differential expression arising from distinct  
553 chronic temperatures over development and from distinct genotypes representative of  
554 phylogeographic groups from Tropical versus Temperate parts of the world, altering expression  
555 for over half of its genes. Genotype-specific responses to temperature represent the most  
556 common kind of differential expression (i.e. non-additive genotype-by-environment interactions),  
557 with less than a quarter of differentially-expressed genes being sensitive to temperature alone  
558 or genotype alone. Our temperature and genotype conditions cluster transcriptome responses  
559 into 22 co-expression modules, each comprised of genes with distinctive functional and  
560 evolutionary properties that reveal an important role for genome structure in transcriptomic  
561 patterns of differential expression.

### 562 ***The influence of genome structure in differential expression profiles***

563 We found that genome structure plays an important role in shaping the landscape of differential  
564 expression of the *C. briggsae* transcriptome, and in the molecular evolutionary features of the  
565 corresponding genes. Transcriptome profiles cluster within and between chromosomes, making  
566 them susceptible to cryptic correlations with other non-random genomic features. For example,  
567 genes showing genotype-dependent expression were enriched on *C. briggsae* chromosomal  
568 arms, genomic regions that also are rich in SNPs and with high rates of recombination (Ross *et*

569 *al.* 2011; Thomas *et al.* 2015). This pattern is reminiscent of the excess of eQTL and loci with  
570 genotype-dependent expression on *C. elegans* chromosome arms (Denver *et al.* 2005;  
571 Rockman *et al.* 2010; Grishkevich *et al.* 2012). One possibility is that direct selection drives this  
572 pattern, as could occur from either adaptive divergence being more prevalent or from purifying  
573 selection being weaker for genes on high recombination arms. Alternatively, it might result as a  
574 byproduct of linked selection, known to be potent in the *C. briggsae* genome (Cutter & Choi  
575 2010; Thomas *et al.* 2015), whereby elimination of polymorphisms from low recombination  
576 centers simply leads to few loci with the potential to show genotype-dependent differential  
577 expression.

578 The higher recombination rate of arm regions means that natural selection favoring a given  
579 allele at one locus will be subject to less interference from selection at other loci in the genome  
580 (Hill & Robertson 1966; Comeron *et al.* 2008; Cutter & Payseur 2013). Experiments implicate  
581 temperature-related adaptive divergence between *C. briggsae* genotypes from Tropical and  
582 Temperate latitudes (Prasad *et al.* 2011). Consequently, gene-specific adaptation to distinct  
583 ecological conditions should operate more efficiently for genes on arms, which might yield the  
584 enrichment of genotype-dependent expression on arms as well as the more rapid sequence  
585 evolution of genes on arms. However, it is difficult to exclude a role of linked selection, as the  
586 high self-fertilization in *C. briggsae* leaves a substantial imprint on genomic patterns of variation  
587 for both synonymous and non-synonymous polymorphisms (Cutter & Choi 2010; Thomas *et al.*  
588 2015). Moreover, if our observations of genotype-dependent differential expression depend  
589 primarily on a small number distant *trans*-acting upstream regulators that influence many target  
590 loci (rather than local *cis*-acting allelic variants for many genes), then the bias toward  
591 chromosome arms of differentially-expressed genes might simply be a byproduct of non-random  
592 distributions of gene functions encoded across the genome.

### 593 **Sequence conservation and regulatory controls**

594 The three co-expression modules with the strongest coding sequence conservation also have  
595 the highest make-up of GxT genes, which exhibit crossing reaction norms and very high  
596 average expression as well as functional enrichment of core biological processes (M14, M18,  
597 M22). This finding of especially strong purifying selection implicates either adaptive plasticity in  
598 the expression control of these modules or unusually low robustness of expression levels to  
599 perturbation from both genotypic and environmental sources. At the other end of the spectrum,  
600 modules displaying the highest average rates of sequence evolution have the lowest overall

601 expression and the most pronounced dependence on genotype alone (M10) or temperature  
602 alone (M12 and M15). These findings are consistent with expression level as a key determinant  
603 of rates of coding sequence evolution, with faster molecular evolution of weakly expressed  
604 genes. Similarly, *C. elegans* genes showing non-interaction differential expression tend to have  
605 low expression levels (Grishkevich *et al.* 2012). These results can be explained by weaker  
606 purifying selection on low-expression genes, though it remains possible that adaptive change  
607 might also play a disproportionate role in their molecular evolution.

608 Among genes located in chromosome centers, those with genotype-dependent differential  
609 expression are enriched for SNPs in upstream non-coding regions, consistent with local *cis*-  
610 acting alleles affecting their expression. However, long-term coding sequence divergence  
611 correlates poorly with non-coding SNP density across genes, implying that the strength of  
612 selection on coding sequence variation may be decoupled from *cis*-regulatory genetic variation  
613 (Castillo-Davis *et al.* 2004; Jordan *et al.* 2005; Lemos *et al.* 2005; Liao & Zhang 2006; Tirosh &  
614 Barkai 2008) or that regulatory elements are too sparse within flanking DNA to leave a clear  
615 selective signature with our approach. Nevertheless, the abundance of loci with zero upstream  
616 SNPs suggests that distant *trans*-regulatory control is a profound source of genetic variation in  
617 the differential expression patterns that we quantified, consistent with studies of short  
618 evolutionary timescales in other systems (Stern & Orgogozo 2008; Wittkopp & Kalay 2012). For  
619 example, eQTL analysis for both *C. elegans* and yeast implicates a stronger role for *trans*-  
620 relative to *cis*-regulation of genotype-environment interactions (Li *et al.* 2006; Smith & Kruglyak  
621 2008).

## 622 ***Gene function in differential expression profiles***

623 We found that module M5 was unique in having a large representation of sperm-related genes  
624 among its orthologs to *C. elegans* genes with spermatogenesis-enriched function. It includes  
625 overrepresentation of genes with phosphatase/kinase activity and is associated with glycogen  
626 metabolism, which previous studies show to be especially important in sperm function (Reinke  
627 *et al.* 2004; Thomas *et al.* 2012; Wu *et al.* 2012; Yin *et al.* 2018). Both genotype and  
628 temperature were important determinants of expression profiles in M5 (Figure 3), implicating the  
629 potential for both adaptive divergence and phenotypic plasticity to influence gene responses.  
630 Sperm-dependent fertility appears to be especially sensitive to high temperature, with Tropical  
631 and Temperate genotypes of *C. briggsae* differing in sensitivity (Prasad *et al.* 2011; Pouillet *et al.*  
632 2015), though module M5 shows additive contributions for genetic and temperature effects. As

633 expected for sperm genes (Reinke *et al.* 2000; Reinke & Cutter 2009; Albritton *et al.* 2014),  
634 genes from M5 are especially rare on the X-chromosome and virtually absent from operons.

635 Opposite to the rarity of operon genes in sperm-enriched module M5, fully 60% of the genes in  
636 module M21 occurred in operons and yet less than 17% of them had individually significant  
637 differential expression. Overall, genes in operons were much less likely to show significant  
638 differential expression than non-operon genes (43% of operon vs. 56% of non-operon genes;  
639 Fisher exact test  $P < 0.0001$ ). *C. elegans* operon genes, most of which are conserved in *C.*  
640 *briggsae* (Qian & Zhang 2008), are known to show high expression during growth, as for gonad  
641 tissue (Reinke & Cutter 2009) and following growth-arrested states (Zaslaver *et al.* 2011), and  
642 generally have non-dynamic expression profiles across ontogeny (Cutter *et al.* 2019). These  
643 observations are consistent with operon genes being disproportionately robust to both  
644 environmental and genetic perturbation.

#### 645 ***Plasticity versus adaptive divergence in expression profiles***

646 In *C. elegans* and *C. remanei*, plasticity dominates the transcriptome response to temperature  
647 stress, at least in terms of acute heat shock (Jovic *et al.* 2017; Sikkink *et al.* 2019). We also  
648 found in *C. briggsae* that over 90% of differentially-expressed genes changed at least in part  
649 due to temperature, but more commonly due to chronic cool rather than warm conditions. If  
650 environment-dependent expression responses reflect adaptive plasticity, then our observations  
651 suggest stronger canalization of stereotyped cool-rearing expression responses. While the large  
652 number of such differentially-expressed genes does not pinpoint the key determinants of  
653 temperature-dependent adaptive divergence, we can nevertheless largely rule out the nearly  
654 9500 genes in the genome that show temperature-only effects or no differential expression. Our  
655 analysis of *C. briggsae* finds a stronger signal of genotype-dependent differential gene  
656 expression than the *C. remanei* study, perhaps reflecting the longer period of divergence  
657 between AF16 and HK104 than between the experimental evolution lines for *C. remanei*, in  
658 addition to technical differences between the studies (Sikkink *et al.* 2019). Warm conditions  
659 causing pervasive genotype-specific responses in *C. briggsae* might reflect adaptive evolution  
660 by the distinct genetic backgrounds from Tropical and Temperate regions (Prasad *et al.* 2011).  
661 Phylogenetic comparative analysis of differential expression among genotypes and  
662 environments could prove fruitful in deciphering whether shared gene networks across species  
663 provide common substrate for adaptive divergence and adaptive plasticity in organismal  
664 responses to chronic and acute temperature stress.

## 665 **Conclusions**

666 Genome-wide differential gene expression is sensitive to both extrinsic temperature conditions  
667 and to intrinsic genomic background in the nematode *C. briggsae*, with co-expression modules  
668 defining distinctive functional features, genomic distributions and molecular evolutionary  
669 patterns of their constituent genes. Most genotype-specific responses occur under heat stress,  
670 indicating that cold versus heat stress responses involve distinct genomic architectures. Co-  
671 expression modules associated with reproductive function, and which exhibit strong sensitivity  
672 to both temperature and genotype, provide candidates for adaptive divergence between  
673 Temperate and Tropical phylogeographic groups of *C. briggsae*. The fastest-evolving protein  
674 coding sequences correspond to a predominant influence of temperature alone or genotype  
675 alone, and have overall low levels of expression across conditions. However, chromosome-  
676 scale patterning of nucleotide differences is a key predictor of SNP content of genes,  
677 undermining gene-centric causes and *cis*-regulatory inferences for SNP differences across  
678 differential-expression classes of genes. These findings highlight the powerful way that genome  
679 structure can influence transcriptome profiles to make them susceptible to cryptic correlations  
680 with other non-random genomic features.

## 681 **Acknowledgements**

682 We are grateful to Rajarshi Ghosh and Leonid Kruglyak for helping to generate and share  
683 HK104 genomic sequence. We also thank two anonymous reviewers for constructive feedback  
684 on earlier drafts of the manuscript. This work was supported by funds from the Natural Sciences  
685 and Engineering Research Council of Canada and a Canada Research Chair to ADC and to  
686 JMC.

## 687 **References**

688  
689 Albritton SE, Kranz A-L, Rao P, *et al.* (2014) Sex-biased gene expression and evolution of the X  
690 chromosome in nematodes. *Genetics* **197**, 865-883.  
691 Anders S, McCarthy DJ, Chen Y, *et al.* (2013) Count-based differential expression analysis of  
692 RNA sequencing data using R and Bioconductor. *Nat. Protocols* **8**, 1765-1786.  
693 Benjamini Y, Hochberg Y (1995) Controlling the false discovery rate: a practical and powerful  
694 approach to multiple testing. *Journal of the Royal Statistical Society. Series B*  
695 *(Methodological)* **57**, 289-300.  
696 Blumenthal T, Evans D, Link CD, *et al.* (2002) A global analysis of *Caenorhabditis elegans*  
697 operons. *Nature* **417**, 851-854.

- 698 Bolger AM, Lohse M, Usadel B (2014) Trimmomatic: a flexible trimmer for Illumina sequence  
699 data. *Bioinformatics* **30**, 2114-2120.
- 700 Carroll SB (2008) Evo-devo and an expanding evolutionary synthesis: a genetic theory of  
701 morphological evolution. *Cell* **134**, 25-36.
- 702 Castillo-Davis CI, Hartl DL, Achaz G (2004) cis-Regulatory and protein evolution in orthologous  
703 and duplicate genes. *Genome Research* **14**, 1530-1536.
- 704 Causton HC, Ren B, Koh SS, *et al.* (2001) Remodeling of yeast genome expression in response  
705 to environmental changes. *Molecular Biology of the Cell* **12**, 323-337.
- 706 Comeron JM, Williford A, Kliman RM (2008) The Hill-Robertson effect: evolutionary  
707 consequences of weak selection and linkage in finite populations. *Heredity* **100**, 19-31.
- 708 Cutter AD (2018) X exceptionalism in *Caenorhabditis* speciation. *Molecular Ecology* **0**.
- 709 Cutter AD, Choi JY (2010) Natural selection shapes nucleotide polymorphism across the  
710 genome of the nematode *Caenorhabditis briggsae*. *Genome Research* **20**, 1103-1111.
- 711 Cutter AD, Félix M-A, Barriere A, Charlesworth D (2006) Patterns of nucleotide polymorphism  
712 distinguish temperate and tropical wild isolates of *Caenorhabditis briggsae*. *Genetics*  
713 **173**, 2021-2031.
- 714 Cutter AD, Garrett RH, Mark S, Wang W, Sun L (2019) Molecular evolution across  
715 developmental time reveals rapid divergence in early embryogenesis. *bioRxiv*, 518621.
- 716 Cutter AD, Payseur BA (2013) Genomic signatures of selection at linked sites: unifying the  
717 disparity among species. *Nature Reviews Genetics* **14**, 262-274.
- 718 de Visser JAGM, Hermisson J, Wagner GP, *et al.* (2003) Evolution and detection of genetic  
719 robustness. *Evolution* **57**, 1959-1972.
- 720 Denver DR, Morris K, Streelman JT, *et al.* (2005) The transcriptional consequences of mutation  
721 and natural selection in *Caenorhabditis elegans*. *Nature Genetics* **37**, 544-548.
- 722 Dobin A, Davis CA, Schlesinger F, *et al.* (2013) STAR: ultrafast universal RNA-seq aligner.  
723 *Bioinformatics* **29**.
- 724 Fang Z, Cui X (2011) Design and validation issues in RNA-seq experiments. *Briefings in*  
725 *Bioinformatics* **12**, 280-287.
- 726 Felix M-A, Jovelín R, Ferrari C, *et al.* (2013) Species richness, distribution and genetic diversity  
727 of *Caenorhabditis* nematodes in a remote tropical rainforest. *BMC Evolutionary Biology*  
728 **13**, 10.
- 729 Flatt T (2005) The evolutionary genetics of canalization. *The Quarterly Review of Biology* **80**,  
730 287-316.
- 731 Gagneur J, Stegle O, Zhu C, *et al.* (2013) Genotype-Environment Interactions Reveal Causal  
732 Pathways That Mediate Genetic Effects on Phenotype. *PLoS Genetics* **9**, e1003803.
- 733 Grishkevich V, Ben-Elazar S, Hashimshony T, *et al.* (2012) A genomic bias for genotype-  
734 environment interactions in *C. elegans*. *Molecular Systems Biology*  
735 **8**.
- 736 Grishkevich V, Yanai I (2013) The genomic determinants of genotype × environment  
737 interactions in gene expression. *Trends in Genetics* **29**, 479-487.
- 738 GuhaThakurta D, Palomar L, Stormo GD, *et al.* (2002) Identification of a novel cis-regulatory  
739 element involved in the heat shock response in *Caenorhabditis elegans* using microarray  
740 gene expression and computational methods. *Genome Research* **12**, 701-712.
- 741 Haerty W, Artieri C, Khezri N, Singh RS, Gupta BP (2008) Comparative analysis of function and  
742 interaction of transcription factors in nematodes: extensive conservation of orthology  
743 coupled to rapid sequence evolution. *BMC Genomics* **9**, 399.
- 744 Hecker M, Lambeck S, Toepfer S, van Someren E, Guthke R (2009) Gene regulatory network  
745 inference: Data integration in dynamic models—A review. *BioSystems* **96**, 86-103.
- 746 Hill WG, Robertson A (1966) Effect of linkage on limits to artificial selection. *Genetical Research*  
747 **8**, 269-294.



- 748 Hillier LW, Miller RD, Baird SE, *et al.* (2007) Comparison of *C. elegans* and *C. briggsae* genome  
749 sequences reveals extensive conservation of chromosome organization and synteny.  
750 *PLoS Biology* **5**, e167.
- 751 Jordan IK, Mariño-Ramírez L, Koonin EV (2005) Evolutionary significance of gene expression  
752 divergence. *Gene* **345**, 119-126.
- 753 Jovelín R, Cutter AD (2011) MicroRNA sequence variation potentially contributes to within-  
754 species functional divergence in the nematode *Caenorhabditis briggsae*. *Genetics* **189**,  
755 967-976.
- 756 Jovic K, Sterken MG, Grilli J, *et al.* (2017) Temporal dynamics of gene expression in heat-  
757 stressed *Caenorhabditis elegans*. *PLoS ONE* **12**, e0189445.
- 758 Keightley PD, Lynch M (2003) Toward a realistic model of mutations affecting fitness. *Evolution*  
759 **57**, 683-685.
- 760 Kim SK, Lund J, Kiraly M, *et al.* (2001) A gene expression map for *Caenorhabditis elegans*.  
761 *Science* **293**, 2087-2092.
- 762 Knowles DA, Davis JR, Edgington H, *et al.* (2017) Allele-specific expression reveals interactions  
763 between genetic variation and environment. *Nature Methods* **14**, 699.
- 764 Langfelder P, Horvath S (2007) Eigengene networks for studying the relationships between co-  
765 expression modules. *BMC Systems Biology* **1**, 54.
- 766 Langfelder P, Horvath S (2008) WGCNA: an R package for weighted correlation network  
767 analysis. *BMC Bioinformatics* **9**, 559.
- 768 Law CW, Chen Y, Shi W, Smyth GK (2014) voom: precision weights unlock linear model  
769 analysis tools for RNA-seq read counts. *Genome Biology* **15**, R29.
- 770 Lemos B, Bettencourt BR, Meiklejohn CD, Hartl DL (2005) Evolution of proteins and gene  
771 expression levels are coupled in *Drosophila* and are independently associated with  
772 mRNA abundance, protein length, and number of protein-protein interactions. *Molecular*  
773 *Biology and Evolution* **22**, 1345-1354.
- 774 Li Y, Alvarez OA, Gutteling EW, *et al.* (2006) Mapping determinants of gene expression  
775 plasticity by genetical genomics in *C. elegans*. *PLoS Genetics* **2**, e222.
- 776 Liao B-Y, Zhang J (2006) Evolutionary conservation of expression profiles between human and  
777 mouse orthologous genes. *Molecular Biology and Evolution* **23**, 530-540.
- 778 Lindquist S, Craig EA (1988) The Heat-Shock Proteins. *Annual Review of Genetics* **22**, 631-  
779 677.
- 780 Merritt C, Rasoloson D, Ko D, Seydoux G (2008) 3' UTRs are the primary regulators of gene  
781 expression in the *C. elegans* germline. *Current Biology* **18**, 1476-1482.
- 782 Mi H, Dong Q, Muruganujan A, *et al.* (2010) PANTHER version 7: improved phylogenetic trees,  
783 orthologs and collaboration with the Gene Ontology Consortium. *Nucleic Acids Research*  
784 **38**, D204-D210.
- 785 Nikolayeva O, Robinson MD (2014) edgeR for differential RNA-seq and ChIP-seq analysis: an  
786 application to stem cell biology. In: *Stem Cell Transcriptional Networks: Methods and*  
787 *Protocols* (ed. Kidder BL), pp. 45-79. Springer New York, New York, NY.
- 788 Ortiz MA, Noble D, Sorokin EP, Kimble J (2014) A new dataset of spermatogenic vs. oogenic  
789 transcriptomes in the nematode *Caenorhabditis elegans*. *G3: Genes|Genomes|Genetics*  
790 **4**, 1765-1772.
- 791 Pouillet N, Vielle A, Gimond C, Ferrari C, Braendle C (2015) Evolutionarily divergent thermal  
792 sensitivity of germline development and fertility in hermaphroditic *Caenorhabditis*  
793 nematodes. *Evolution and Development* **17**, 380-397.
- 794 Prasad A, Croydon-Sugarman M, Murray RL, Cutter AD (2011) Temperature-dependent  
795 fecundity associates with latitude in *Caenorhabditis briggsae*. *Evolution* **65**, 52-63.
- 796 Qian W, Zhang J (2008) Evolutionary dynamics of nematode operons: Easy come, slow go.  
797 *Genome Research* **18**, 412-421.

- 798 Reinke V, Cutter AD (2009) Germline expression influences operon organization in the  
799 *Caenorhabditis elegans* genome. *Genetics* **181**, 1219-1228.
- 800 Reinke V, Gil IS, Ward S, Kazmer K (2004) Genome-wide germline-enriched and sex-biased  
801 expression profiles in *Caenorhabditis elegans*. *Development* **131**, 311-323.
- 802 Reinke V, Smith HE, Nance J, *et al.* (2000) A global profile of germline gene expression in *C.*  
803 *elegans*. *Molecular Cell* **6**, 605-616.
- 804 Ritchie ME, Smyth GK, Phipson B, *et al.* (2015) limma powers differential expression analyses  
805 for RNA-sequencing and microarray studies. *Nucleic Acids Research* **43**, e47-e47.
- 806 Robinson MD, McCarthy DJ, Smyth GK (2010) edgeR: a Bioconductor package for differential  
807 expression analysis of digital gene expression data. *Bioinformatics* **26**, 139-140.
- 808 Rockman MV, Kruglyak L (2006) Genetics of global gene expression. *Nature Reviews Genetics*  
809 **7**, 862.
- 810 Rockman MV, Skrovanek SS, Kruglyak L (2010) Selection at linked sites shapes heritable  
811 phenotypic variation in *C. elegans*. *Science* **330**, 372-376.
- 812 Ross JA, Koboldt DC, Staisch JE, *et al.* (2011) *Caenorhabditis briggsae* recombinant inbred line  
813 genotypes reveal inter-strain incompatibility and the evolution of recombination. *PLoS*  
814 *Genetics* **7**, e1002174.
- 815 Saito TL, Hashimoto S-i, Gu SG, *et al.* (2013) The transcription start site landscape of *C.*  
816 *elegans*. *Genome Research* **23**, 1348-1361.
- 817 Sikkink KL, Reynolds RM, Ituarte CM, Cresko WA, Phillips PC (2019) Environmental and  
818 evolutionary drivers of the modular gene regulatory network underlying phenotypic  
819 plasticity for stress resistance in the nematode *Caenorhabditis remanei*. *G3:*  
820 *Genes|Genomes|Genetics* **9**, 969-982.
- 821 Smith EN, Kruglyak L (2008) Gene–environment interaction in yeast gene expression. *PLoS*  
822 *Biology* **6**, e83.
- 823 Smith S, Bernatchez L, Beheregaray LB (2013) RNA-seq analysis reveals extensive  
824 transcriptional plasticity to temperature stress in a freshwater fish species. *BMC*  
825 *Genomics* **14**, 375.
- 826 Smyth GK (2005) limma: Linear Models for Microarray Data. In: *Bioinformatics and*  
827 *Computational Biology Solutions Using R and Bioconductor* (eds. Gentleman R, Carey  
828 VJ, Huber W, Irizarry RA, Dudoit S), pp. 397-420. Springer New York, New York, NY.
- 829 Snoek BL, Sterken MG, Bevers RPJ, *et al.* (2017) Contribution of trans regulatory eQTL to  
830 cryptic genetic variation in *C. elegans*. *BMC Genomics* **18**, 500.
- 831 Snoek BL, Volkers RJM, Nijveen H, *et al.* (2019) A multi-parent recombinant inbred line  
832 population of *C. elegans* allows identification of novel QTLs for complex life history traits.  
833 *BMC Biology* **17**, 24.
- 834 Stegeman GW, Baird SE, Ryu WS, Cutter AD (2019) Genetically distinct behavioral modules  
835 underlie natural variation in thermal performance curves. *bioRxiv*, 523654.
- 836 Stegeman GW, Bueno de Mesquita M, Ryu WS, Cutter AD (2013) Temperature-dependent  
837 behaviours are genetically variable in the nematode *Caenorhabditis briggsae*. *Journal of*  
838 *Experimental Biology* **216**, 850-858.
- 839 Stern DL, Orgogozo V (2008) The loci of evolution: how predictable is genetic evolution?  
840 *Evolution* **62**, 2155-2177.
- 841 Stiernagle TL (1999) Maintenance of *C. elegans*. In: *C. elegans: A Practical Approach* (ed.  
842 Hope IA). Oxford University Press, New York.
- 843 Thomas CG, Li RH, Smith HE, *et al.* (2012) Simplification and desexualization of gene  
844 expression in self-fertile nematodes. *Current Biology* **22**, 2167-2172.
- 845 Thomas CG, Wang W, Jovelín R, *et al.* (2015) Full-genome evolutionary histories of selfing,  
846 splitting and selection in *Caenorhabditis*. *Genome Research* **25**, 667-678.
- 847 Tirosh I, Barkai N (2008) Evolution of gene sequence and gene expression are not correlated in  
848 yeast. *Trends in Genetics* **24**, 109-113.

- 849 Tirosh I, Reikhav S, Levy AA, Barkai N (2009) A yeast hybrid provides insight into the evolution  
850 of gene expression regulation. *Science* **324**, 659.
- 851 Tu S, Wu MZ, Wang J, *et al.* (2015) Comparative functional characterization of the CSR-1 22G-  
852 RNA pathway in *Caenorhabditis* nematodes. *Nucleic Acids Research* **43**, 208-224.
- 853 Ungerer MC, Johnson LC, Herman MA (2007) Ecological genomics: understanding gene and  
854 genome function in the natural environment. *Heredity* **100**, 178.
- 855 Wittkopp PJ, Haerum BK, Clark AG (2004) Evolutionary changes in cis and trans gene  
856 regulation. *Nature* **430**, 85.
- 857 Wittkopp PJ, Haerum BK, Clark AG (2008) Regulatory changes underlying expression  
858 differences within and between *Drosophila* species. *Nature Genetics* **40**, 346-350.
- 859 Wittkopp PJ, Kalay G (2012) Cis-regulatory elements: molecular mechanisms and evolutionary  
860 processes underlying divergence. *Nature Reviews Genetics* **13**, 59-69.
- 861 Wu J-c, Go AC, Samson M, *et al.* (2012) Sperm development and motility are regulated by PP1  
862 phosphatases in *Caenorhabditis elegans*. *Genetics* **190**, 143.
- 863 Yin D, Schwarz EM, Thomas CG, *et al.* (2018) Rapid genome shrinkage in a self-fertile  
864 nematode reveals sperm competition proteins. *Science* **359**, 55-61.
- 865 Zaslaver A, Baugh LR, Sternberg Paul W (2011) Metazoan operons accelerate recovery from  
866 growth-arrested states. *Cell* **145**, 981-992.
- 867 Zhang B, Horvath S (2005) A general framework for weighted gene co-expression network  
868 analysis. *Statistical Applications in Genetics and Molecular Biology* **4**, 1-45.

869

870 **Data accessibility**

871 Data used for analysis is provided in NCBI in project accession PRJNA509247 for  
872 transcriptome and genome sequences, with online supplement summary tables to be  
873 submitted to Dryad, strains are publicly available from the Caenorhabditis Genetics  
874 Center.

875 **Author contributions**

876 SM, JW, JMC and ADC designed research; SM, JW, ES, TL and WW performed  
877 research; JMC and ADC contributed reagents/analytic tools; SM, TL, WW and ADC  
878 analyzed data; SM, JMC and ADC wrote and edited the manuscript. All authors read  
879 and approved the final manuscript.

880 **Figures**

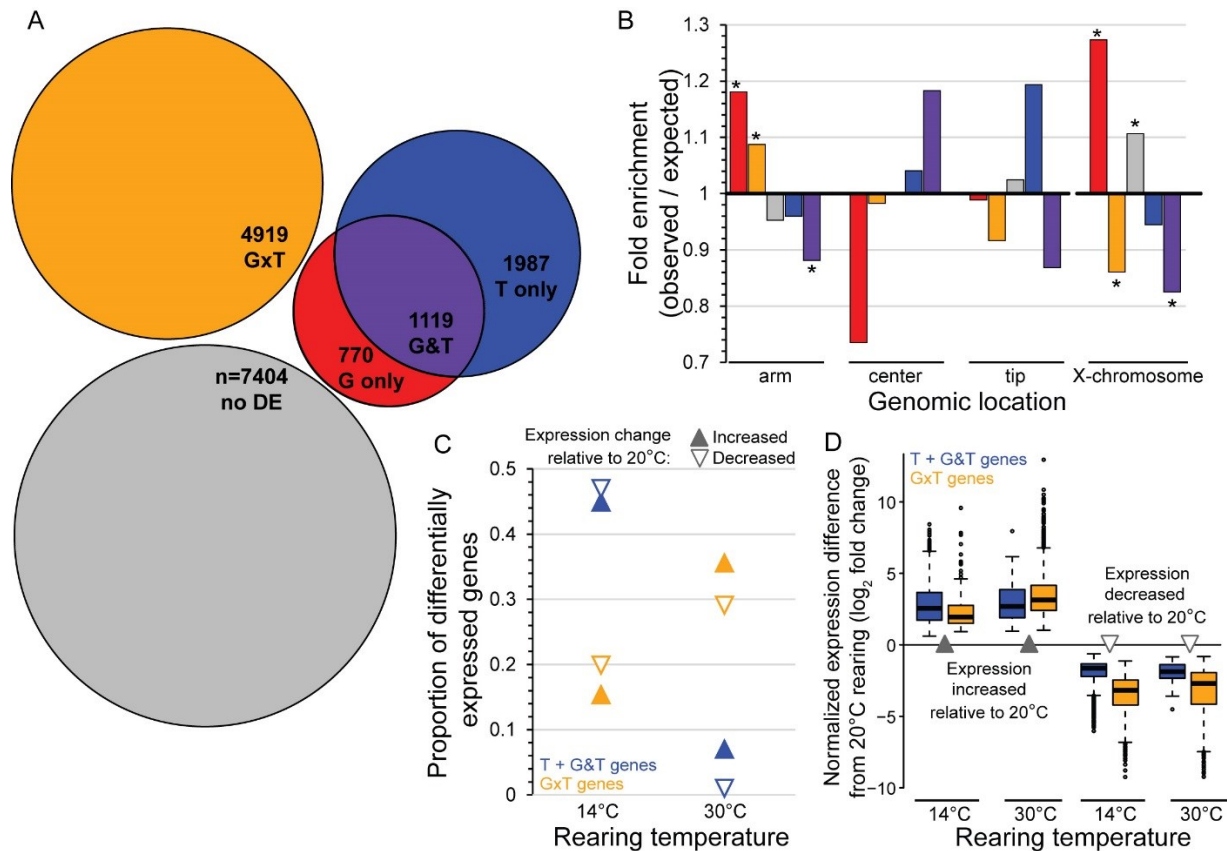

881  
 882 **Figure 1.** (A) Differential expression (DE) analysis identified 54% of 16,199 genes to have  
 883 significant differential expression (8795 genes at 5% FDR in limma, colored area proportional to  
 884 gene number). Most DE genes had significant interaction effects (55.9% “GxT”), whereas 12.6%  
 885 of DE genes had independent additive effects of both genotype and rearing temperature  
 886 (“G&T”). Other DE genes showed effects of genotype alone or rearing temperature treatments  
 887 alone (8.8% “G only”; 22.6% “T only”). (B) G-only and GxT genes are significantly enriched on  
 888 autosomal arms, whereas G&T genes are enriched in autosomal centers (colors as in A; \*  
 889 indicates G-test Bonferroni corrected P<0.05). Genes with G-only or no differential expression  
 890 (“no DE”) are enriched on the X-chromosome, whereas genes with GxT and G&T patterns of  
 891 differential expression are underrepresented on the X-chromosome (\* indicates G-test  
 892 Bonferroni corrected P<0.05). (C) Similar proportions of GxT genes increase vs decrease  
 893 expression at a given stressful rearing temperature relative to benign 20°C (filled vs empty  
 894 orange triangles within a temperature condition), but fewer GxT genes show expression  
 895 differences for cool rearing than for hot rearing (orange triangles for 14°C vs 30°C). By contrast,  
 896 genes with a non-interacting effect of temperature on expression (T only and G&T genes) show  
 897 disproportionate response to cool rearing (blue triangles for 14°C vs all other triangles). (D) The  
 898 magnitude of expression change is similar for genes with a non-interacting effect of temperature  
 899 (T only and G&T genes) under chronic cold stress and chronic heat stress (blue boxes for 14°C  
 900 vs 30°C; median with interquartile range, whiskers show 1.5x interquartile range). For GxT  
 901 genes, however, the magnitude of expression increase is greater under heat stress than cold  
 902 stress (orange boxes for 14°C vs 30°C).

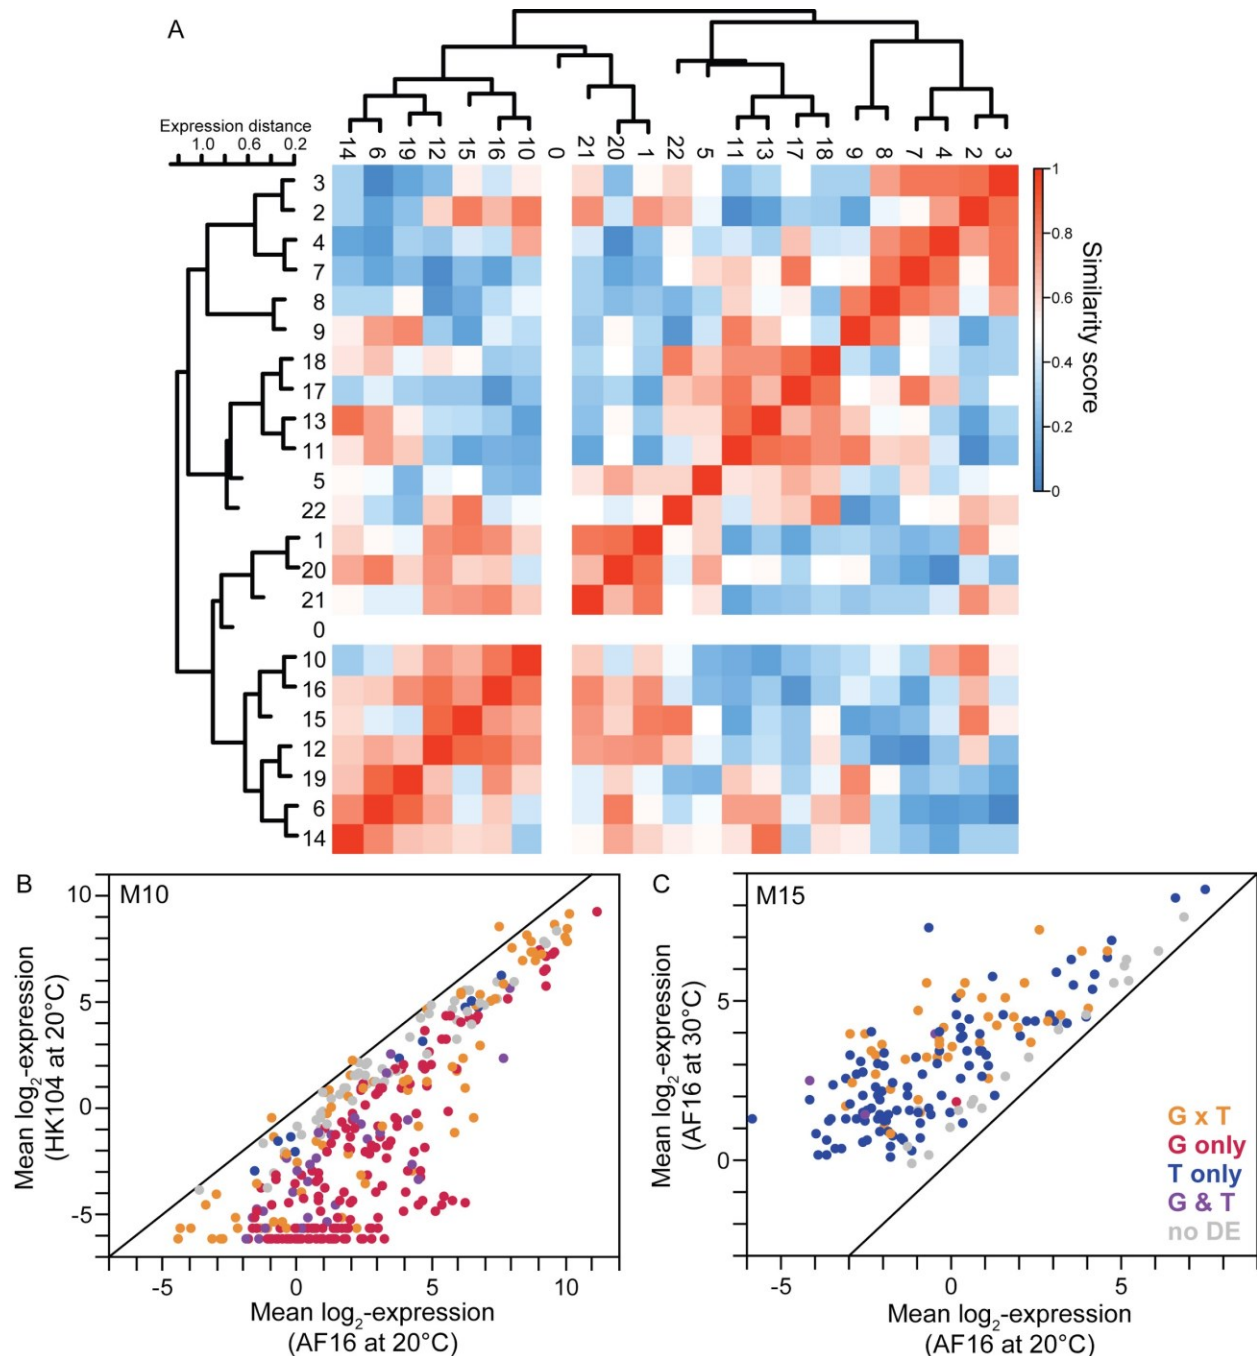

903  
 904 **Figure 2.** (A) WGCNA analysis yielded 23 co-expression modules for 16,199 genes (including  
 905 module M0 with genes that did not cluster), after merging modules with expression similarity  
 906 distance <0.25 from an initial set of 124 co-expressed gene sets. The dendrogram and heatmap  
 907 summarize module expression profile similarity. For example, (B) module M10 is comprised of  
 908 338 genes with disproportionate representation of genotypic differences in expression, reflected  
 909 as higher expression by the AF16 (Tropical) genotype. (C) Module M15, by contrast, is enriched  
 910 in genes with individually significant differential expression due to rearing temperature, as  
 911 reflected in higher expression when reared at 30°C. See also Figure 3.

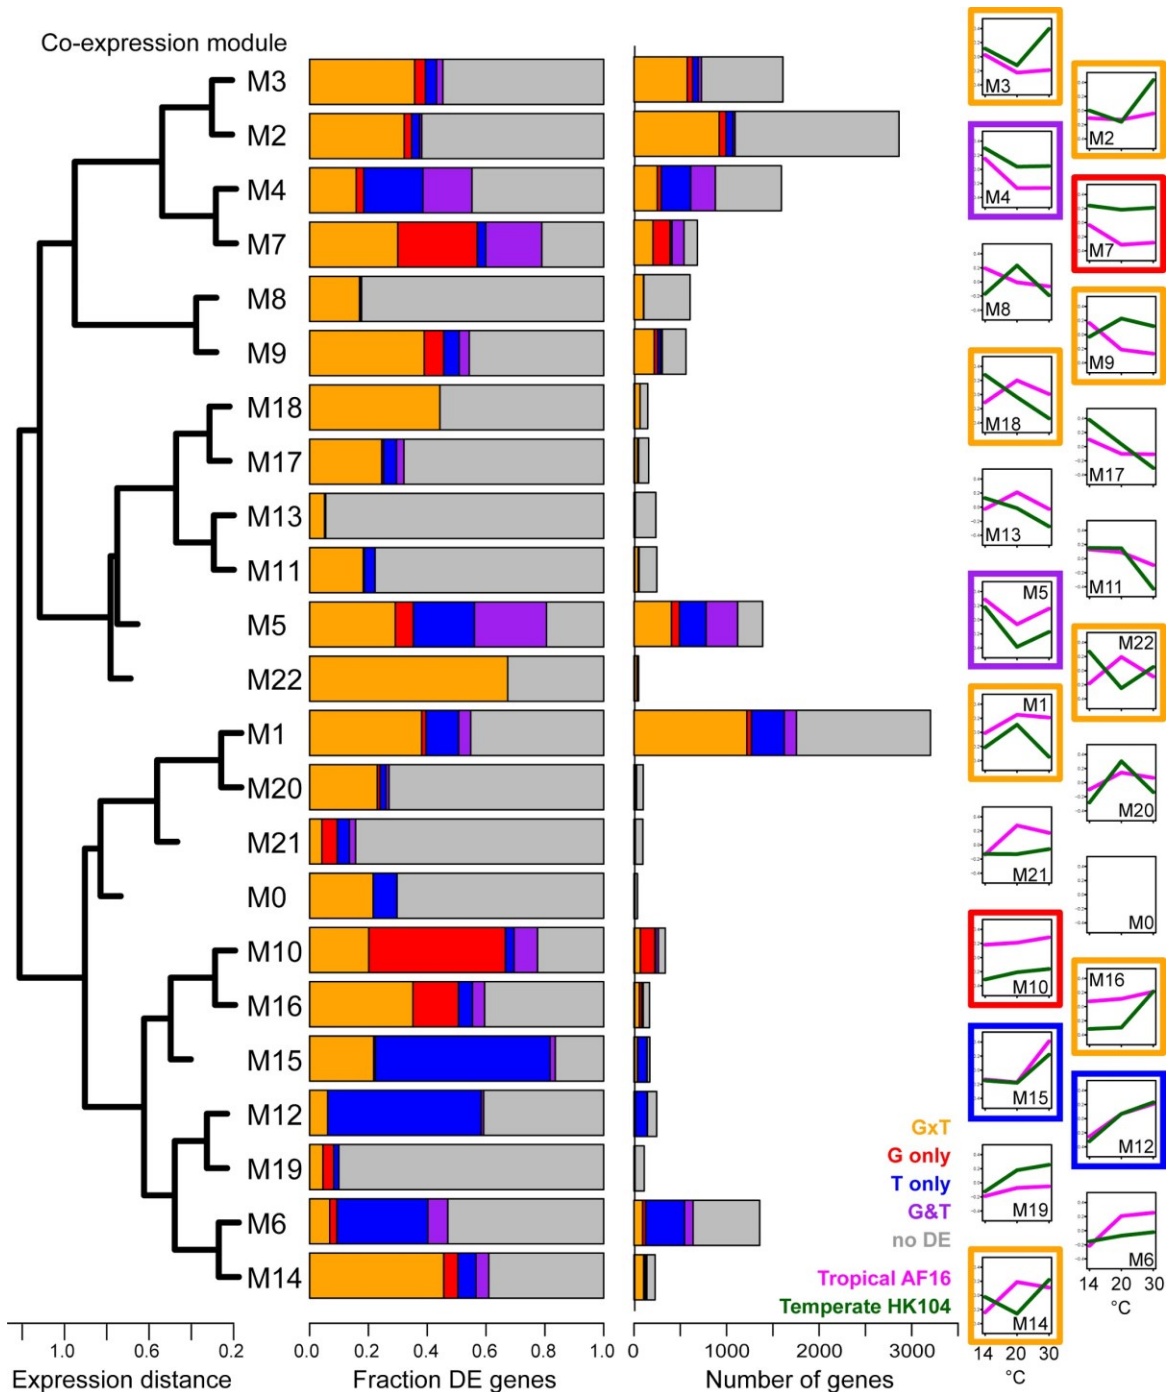

912  
913 **Figure 3.** Co-expression clustering of 16,199 genes into 23 modules, reflected in eigengene  
914 plots of normalized log<sub>2</sub>-transformed expression profiles across rearing temperature treatments  
915 (14°C, 20°C, 30°C) for each genotype (Tropical AF16, Temperate HK104). Modules range in  
916 size from 3203 genes (M1) to 49 genes (M22). Module compositions contained distinctive  
917 representation of genes with individually-significant patterns of differential expression (cf. Figure  
918 1); modules with highest incidence of T-only genes indicated with blue (M12, M15), G-only  
919 genes in red (M7, M10), G&T genes (M4, M5), and GxT genes with crossing or non-crossing  
920 reaction norms (M9, M14, M18, M22; M1, M2, M3, M16) (Supplementary Figure S3).

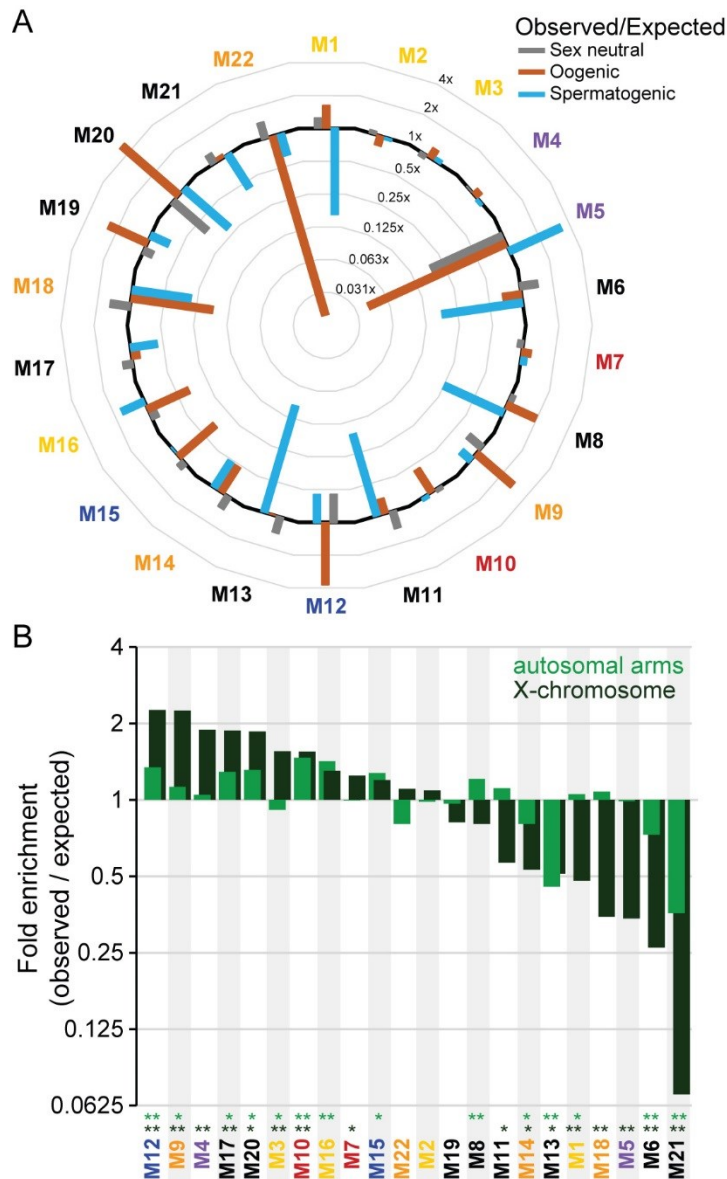

921 **Figure 4.** (A) Module gene over- and under-enrichment for *C. elegans* orthologs with  
 922 spermatogenic, oogenic, or sex neutral expression profiles from Ortiz et al. (2014). Log-2  
 923 interval scale for observed/expected number of genes per module in radial plot, with black line  
 924 indicating a value of 1 (outer curve indicates 4-fold enrichment, innermost curve indicates  $2^{-5}$   
 925 under-enrichment). (B) Module gene over- and under-enrichment across the genome shows  
 926 biases toward autosomal arms (values < 1 indicate enrichment in autosomal centers) and for X-  
 927 linkage (values < 1 indicate enrichment on autosomes). Significant enrichment indicated by \*  
 928 ( $P < 0.05$  after Benjamini-Hochberg adjustment; FDR = 0.05) and \*\* ( $P < 0.001$  after Benjamini-  
 929 Hochberg adjustment; FDR = 0.05). Coloring of module names in A and B corresponds to  
 930 differential enrichment patterns indicated in Figure 3 (blue, T only; red, G only; purple, G&T;  
 931 orange = GxT with crossing reaction norm profile; yellow, GxT with non-crossing reaction norm;  
 932 gray, black, differential expression).



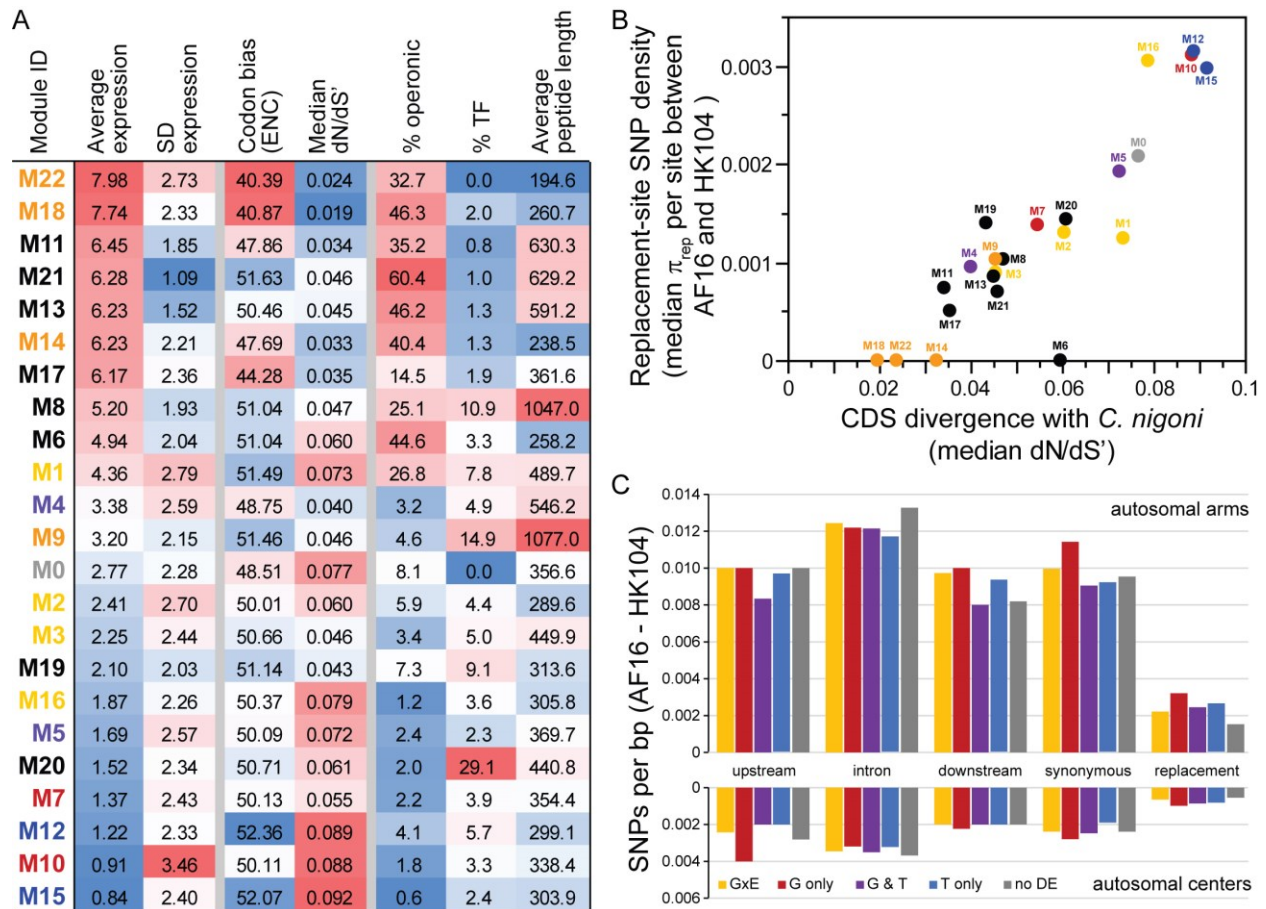

934  
935

936 **Figure 5. (A)** Heatmap of module features, sorted by average normalized expression. Modules  
 937 with high expression profiles tend to contain genes with stronger codon usage bias, greater  
 938 sequence constraint (low dN/dS'), and more operons. **(B)** Modules with gene orthologs having  
 939 little coding sequence divergence between *C. briggsae* and *C. nigoni* also have low densities of  
 940 replacement-site SNPs in coding sequences. Coloring of module names in A and B corresponds  
 941 to differential enrichment patterns indicated in Figure 3 (blue, T only; red, G only; purple, G&T;  
 942 orange = GxT with crossing reaction norm profile; yellow, GxT with non-crossing reaction norm;  
 943 gray, black, differential expression). **(C)** Among genes with distinctive profiles of individually-  
 944 significant differential expression, linkage to autosomal arms versus centers represents the  
 945 primary driver of SNP variation with little difference among DE categories for a given genomic  
 946 site type (1kb upstream of CDS, intronic, 1kb downstream of CDS, synonymous sites).

947 **Supplementary Information**

948

949 **Supplementary File S1.** “SuppFile\_voomNormFiltLog2Expr\_DE\_modules.csv” contains log-2  
950 normalized expression values for each of the 16,199 genes analyzed in each replicate sample,  
951 as well as the category of differential expression (G-only, T-only, G&T, GxT, noDE) and name of  
952 the co-expression module (M0 through M22). Columns labeled with sample name (treatment-  
953 replicate), where treatment is a combination of genotype and rearing temperature for each of  
954 three biological replicates (“AF” = Tropical AF16 genotype, “HK” = Temperate HK104 genotype;  
955 14=14°C rearing, 20=20°C rearing, 30=30°C rearing).

956

957 **Supplementary File S2.** “SuppTable\_GO.xlsx” contains lists of gene ontology term enrichment  
958 with summary statistics for different PANTHER GO-slim categories for each co-expression  
959 module.

960

961 **Supplementary Table S1.** Number and percentage of reads that mapped to unique genomic  
962 locations with STAR.  
963

| Sample (treatment-rep)* | Number of uniquely mapped reads | % of reads that uniquely mapped |
|-------------------------|---------------------------------|---------------------------------|
| AF14-1                  | 32007586                        | 93.35%                          |
| AF14-2                  | 47012080                        | 93.84%                          |
| AF14-3                  | 54523984                        | 94.15%                          |
| AF20-1                  | 57787850                        | 94.17%                          |
| AF20-2                  | 62122726                        | 93.43%                          |
| AF20-3                  | 43596994                        | 93.75%                          |
| AF30-1                  | 66295835                        | 93.74%                          |
| AF30-2                  | 35618842                        | 93.20%                          |
| AF30-3                  | 33087508                        | 90.10%                          |
| HK14-1                  | 51264144                        | 93.39%                          |
| HK14-2                  | 43616826                        | 93.65%                          |
| HK14-3                  | 48035023                        | 92.74%                          |
| HK20-1                  | 30262908                        | 90.76%                          |
| HK20-2                  | 49528582                        | 93.95%                          |
| HK20-3                  | 41332043                        | 94.26%                          |
| HK30-1                  | 51537189                        | 91.44%                          |
| HK30-2                  | 40748065                        | 92.22%                          |
| HK30-3                  | 35632338                        | 73.62%                          |

964 \*AF=AF16, HK=HK104 genotypes; 14=14°C, 20=20°C, 30=30°C rearing

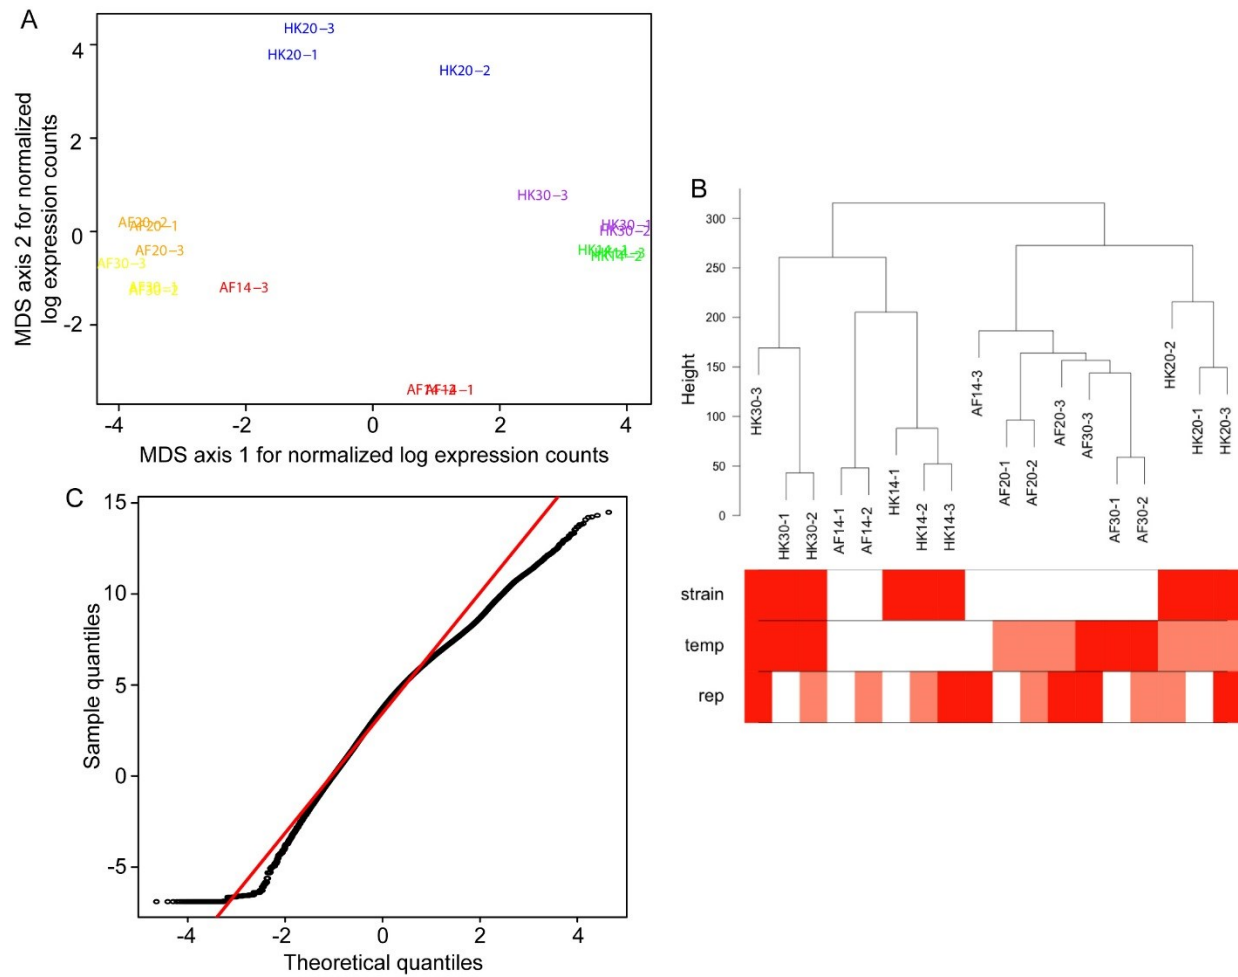

965  
966

967 **Supplementary Figure S1.** (A) Multi-dimensional scaling plot (MDS) of filtered, normalized, and  
 968 log-transformed count data for each sample. Sample labels (treatment-replicate) are colored by  
 969 experimental treatment for a given genotype and rearing temperature combination (“AF” =  
 970 Tropical AF16 genotype, “HK” = Temperate HK104 genotype; 14=14°C rearing, 20=20°C  
 971 rearing, 30=30°C rearing). The x- and y-axes show the two principal components that explain  
 972 most variation. Biological replicates that cluster together in the plot are more similar to each  
 973 other, indicating consistency across replicates. (B) After filtering out genes with very low to no  
 974 counts, TMM normalization for different library sizes, and log-transforming count data, a  
 975 dendrogram reveals similarity of samples within strain and within temperature (“temp”), but not  
 976 replicate (“rep”); red shading along a row indicates shared strain, temperature or replicate value.  
 977 This suggests data heterogeneity among samples due to experimental treatments, not batch  
 978 effects. (C) Quantile-quantile plot for normalized, voom-transformed count data shows good  
 979 approximation to a normal distribution (red line).

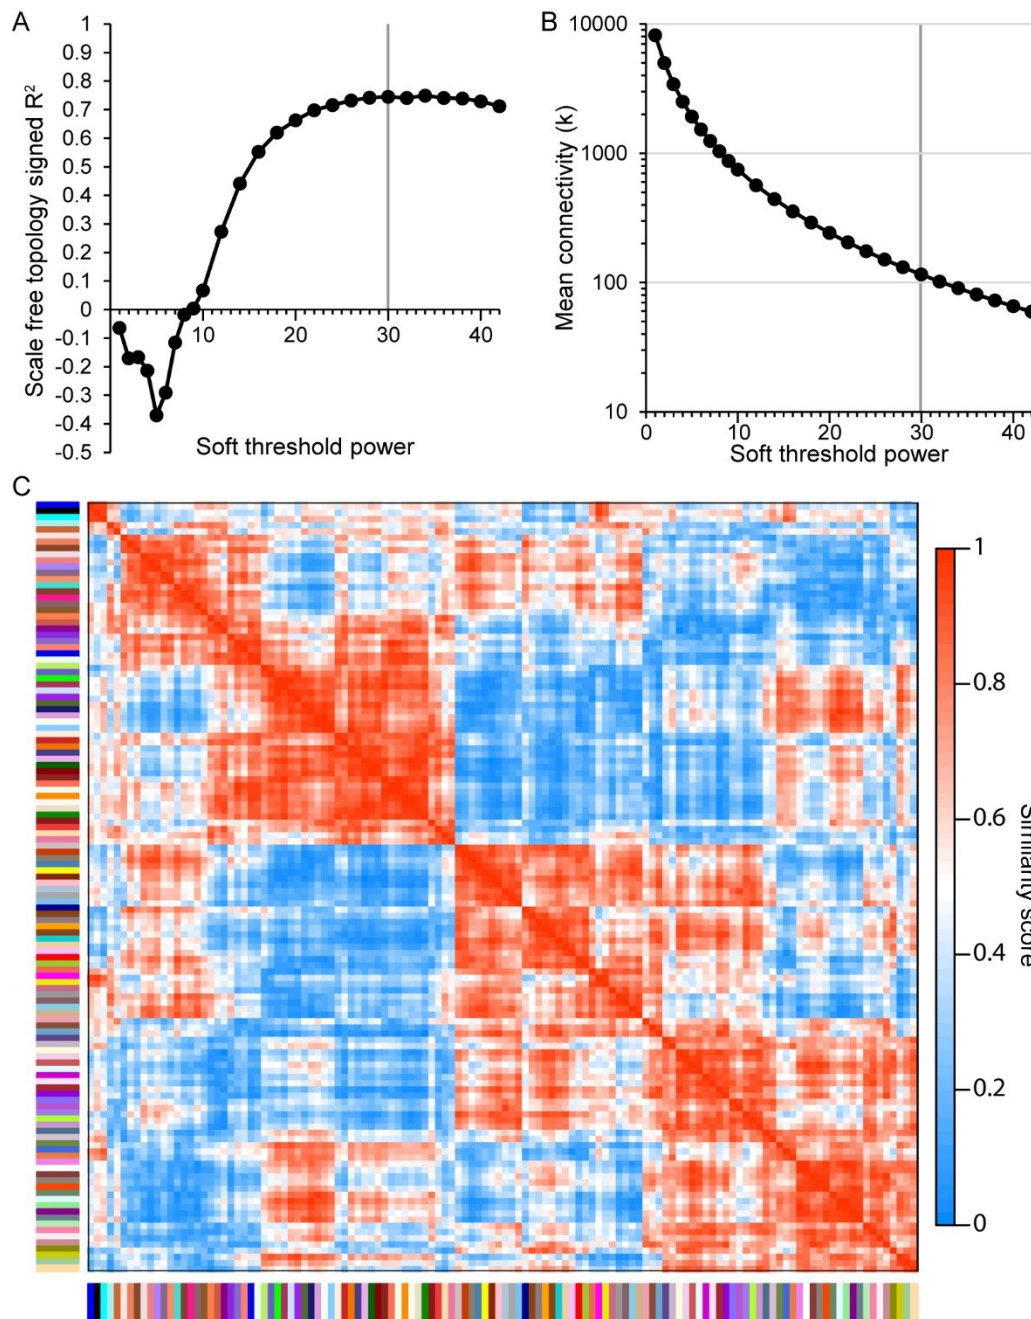

980  
981  
982  
983  
984  
985  
986  
987  
988  
989  
990

**Supplementary Figure S2.** (A) Analysis of soft-thresholding powers revealed 30 to be the power at which the scale-free fit is maximized ( $R^2 = 0.75$ ) and most closely approximates a scale-free network. (B) Analysis of a range of soft-thresholding powers revealed a value of 30 to have a mean connectivity of at least 100 ( $k = 115$ ), while also maximizing fit to a scale-free network. (C) Clustering of 16,199 genes with WGCNA into a preliminary set of 124 co-expression clusters (red in heatmap indicates maximum similarity and blue no similarity; color bars along the x- and y-axes correspond to the 124 clusters). Clusters with similarity distance  $< 0.25$  were merged, leading to the 22 co-expression modules (plus pseudo-module M0) analyzed in the main text.

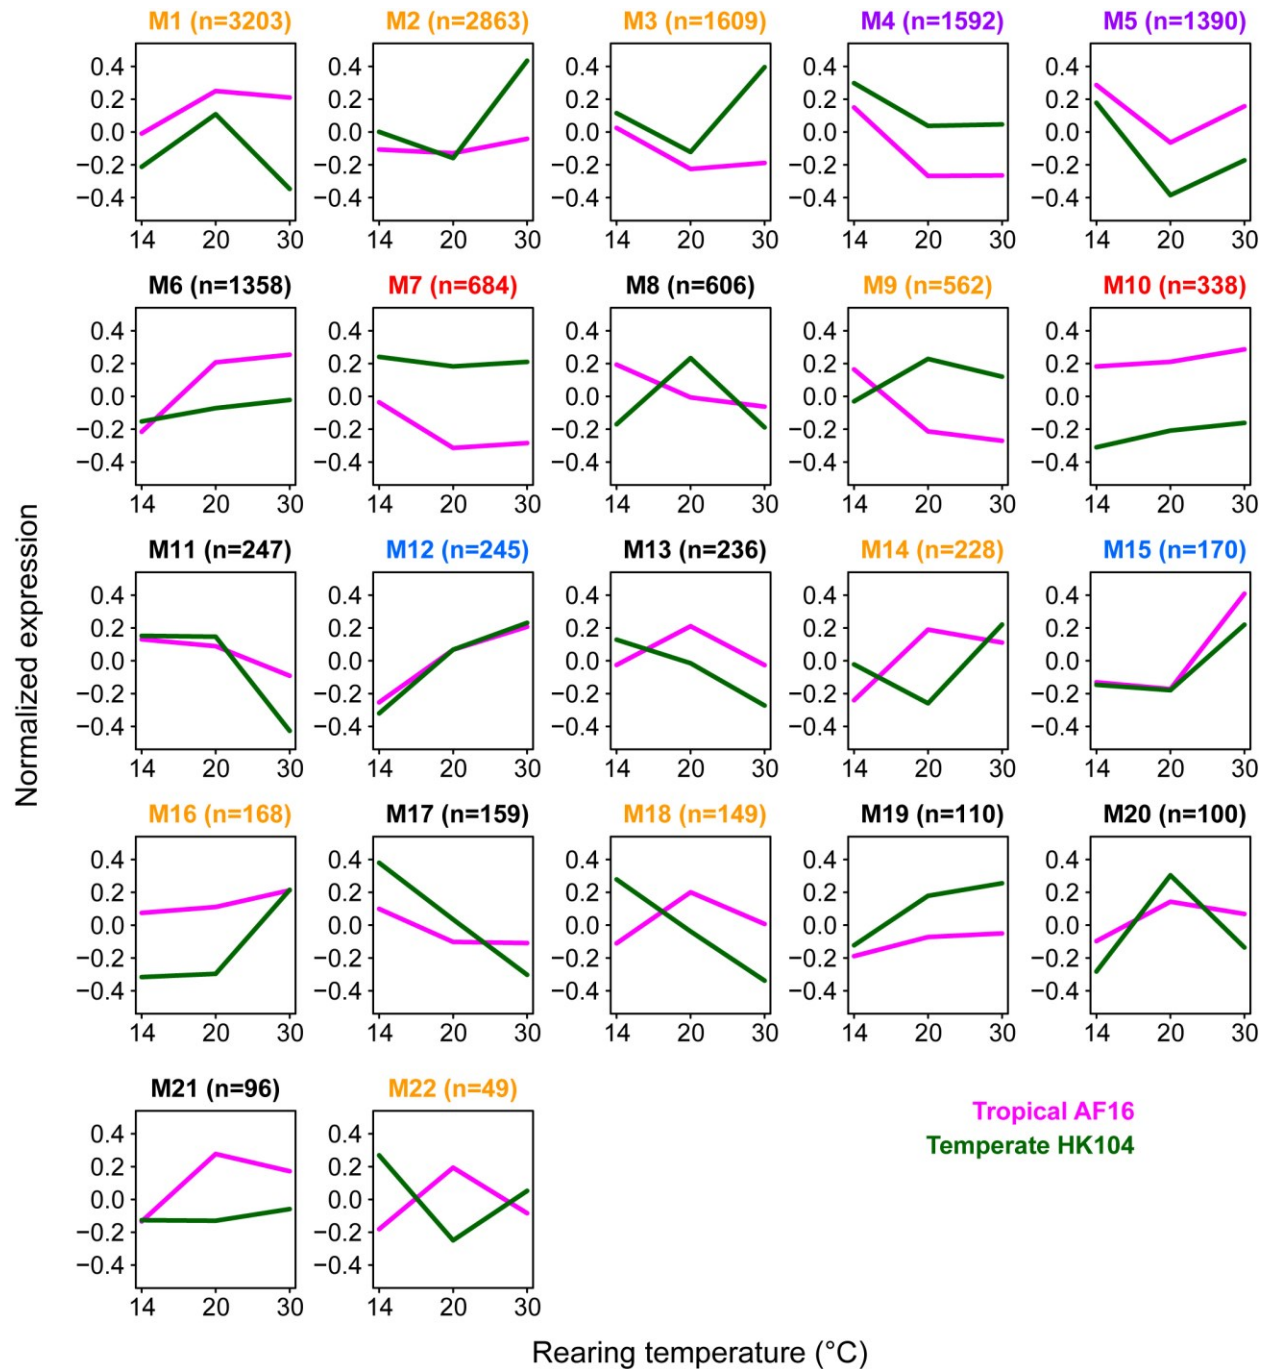

**Supplementary Figure S3.** Co-expression module eigengene plots of normalized, log<sub>2</sub>-transformed expression across temperature treatments for each genotype (pink AF16, green HK104). Module names colored as in Figure 3 of the main text according to representation of individually significant differentially expressed genes within the module.

A Observed / Expected Number of Genes  
per Chromosome

| Module | I            | II    | III          | IV           | V            | X            |
|--------|--------------|-------|--------------|--------------|--------------|--------------|
| M1     | <b>1.433</b> | 1.127 | <b>1.249</b> | 1.072        | <b>0.745</b> | <b>0.468</b> |
| M2     | <b>0.612</b> | 0.876 | <b>0.716</b> | 1.011        | <b>1.506</b> | 1.110        |
| M3     | <b>0.619</b> | 0.911 | <b>0.740</b> | 0.882        | <b>1.230</b> | <b>1.596</b> |
| M4     | <b>0.611</b> | 0.954 | <b>0.762</b> | 0.872        | 0.981        | <b>1.866</b> |
| M5     | <b>1.471</b> | 1.161 | <b>1.314</b> | 0.996        | 0.797        | <b>0.327</b> |
| M6     | <b>1.297</b> | 1.140 | <b>1.498</b> | 1.119        | 0.799        | <b>0.258</b> |
| M7     | 0.784        | 1.071 | <b>0.495</b> | 0.954        | 1.286        | 1.273        |
| M8     | 1.282        | 0.953 | <b>1.493</b> | 1.072        | <b>0.550</b> | 0.783        |
| M9     | 0.976        | 0.674 | 0.711        | 0.826        | <b>0.643</b> | <b>2.255</b> |
| M10    | <b>0.482</b> | 0.920 | 0.664        | 0.709        | 1.359        | 1.478        |
| M11    | 1.167        | 1.259 | 1.322        | 1.021        | 0.776        | 0.582        |
| M12    | 0.665        | 0.932 | <b>0.500</b> | 0.926        | 0.721        | <b>2.244</b> |
| M13    | 1.221        | 1.075 | 1.269        | 1.256        | 0.706        | 0.476        |
| M14    | 1.154        | 1.057 | 1.224        | 1.300        | 0.841        | 0.548        |
| M15    | 0.663        | 0.784 | 1.081        | 1.298        | 0.950        | 1.176        |
| M16    | 0.448        | 0.642 | 0.567        | 0.563        | <b>2.043</b> | 1.153        |
| M17    | 0.552        | 0.838 | <b>0.514</b> | 0.952        | 1.174        | <b>1.807</b> |
| M18    | <b>1.682</b> | 0.852 | 1.370        | 1.185        | 0.644        | <b>0.419</b> |
| M19    | 1.196        | 0.923 | 0.742        | <b>1.433</b> | 0.734        | 0.909        |
| M20    | 1.095        | 1.047 | 0.793        | 0.857        | <b>0.441</b> | <b>1.941</b> |
| M21    | <b>1.566</b> | 1.123 | <b>2.268</b> | 0.854        | 0.473        | <b>0.065</b> |
| M22    | <b>1.662</b> | 0.906 | 0.833        | 1.544        | <b>0.338</b> | 1.020        |

B

|        | I            | II           | III          | IV           | V            | X            |
|--------|--------------|--------------|--------------|--------------|--------------|--------------|
| T only | 1.054        | <b>1.108</b> | 1.018        | 0.994        | 0.915        | 0.950        |
| G only | <b>0.818</b> | 0.952        | <b>0.722</b> | <b>0.832</b> | <b>1.195</b> | <b>1.236</b> |
| G&T    | <b>1.176</b> | 1.083        | 1.064        | 1.099        | 0.843        | 0.832        |
| GxT    | 0.984        | 1.053        | 0.918        | 1.038        | <b>1.111</b> | <b>0.859</b> |
| no DE  | 0.989        | 0.928        | <b>1.069</b> | 0.979        | 0.952        | <b>1.108</b> |

997

998

999

1000

1001

1002

**Supplementary Figure S4.** Enrichment (observed/expected) number of genes on each chromosome for modules (A) and differential-expression categories (B). Values in black bold text indicate significant enrichment or under-enrichment after Bonferroni multiple-test correction ( $\chi^2$  test df=1 with  $\alpha=0.05/132$  for modules,  $\alpha=0.05/30$  for categories).

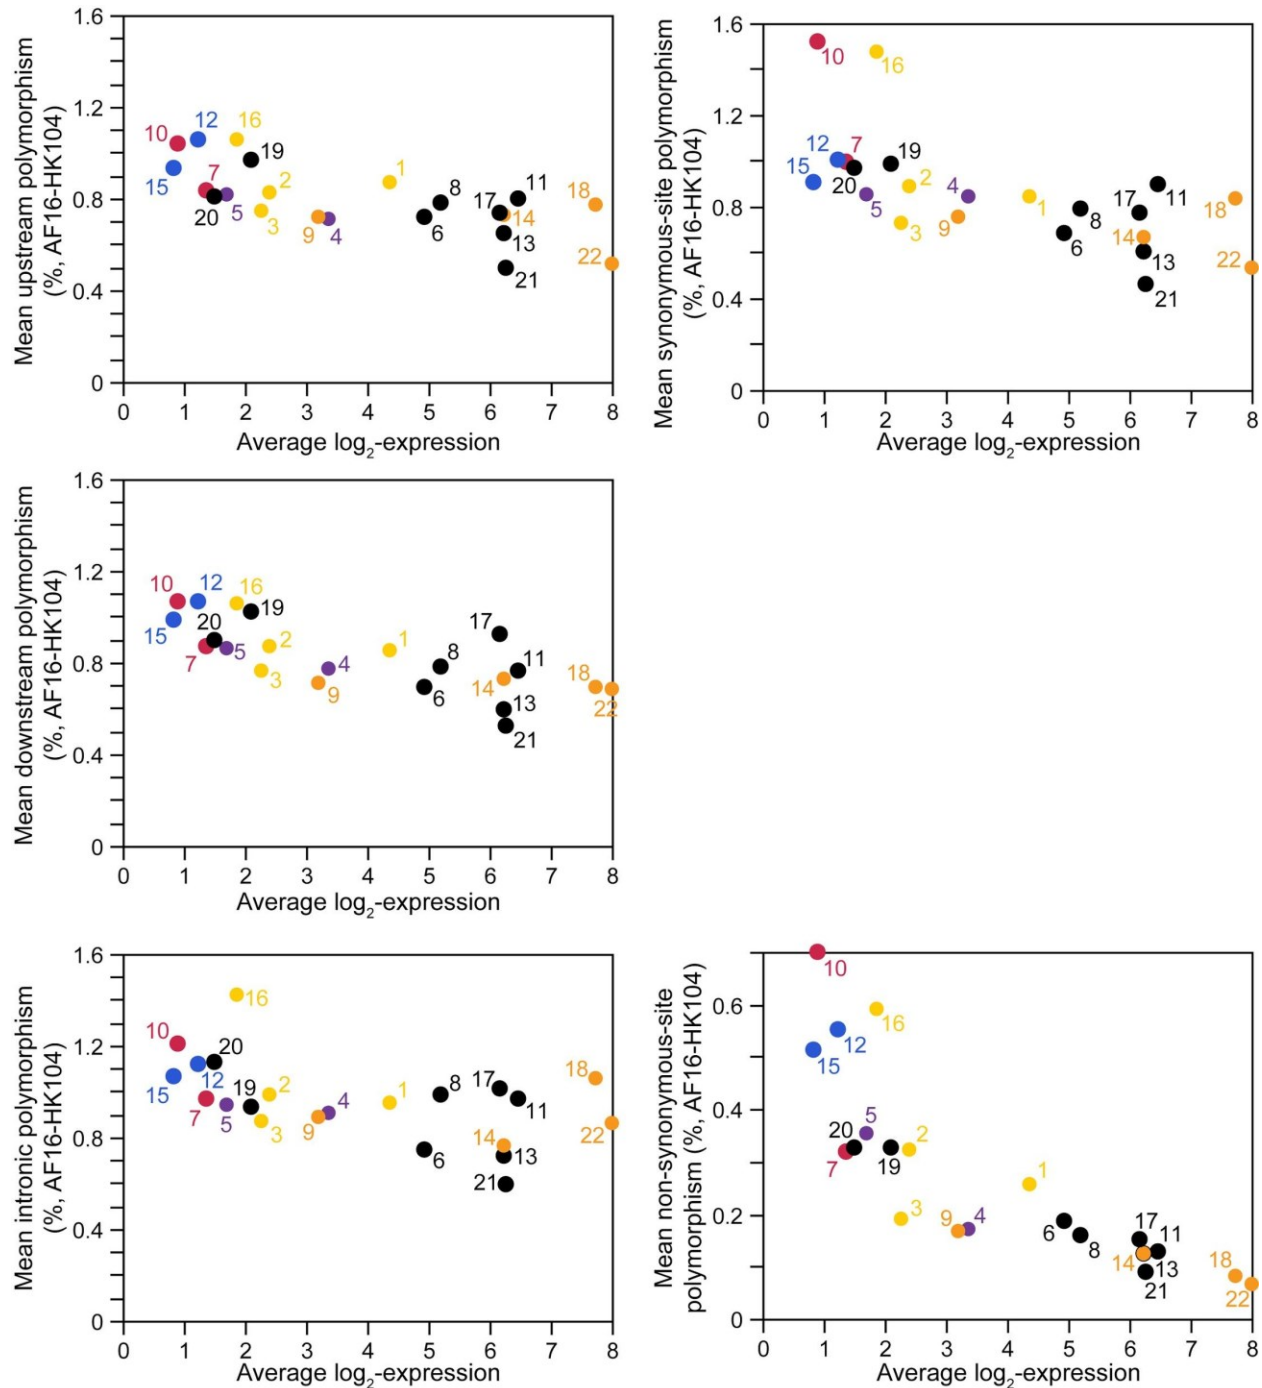

1003  
1004  
1005  
1006  
1007  
1008  
1009  
1010  
1011

**Supplementary Figure S5.** SNP density in upstream, downstream, and intronic non-coding locations of genes and at synonymous and non-synonymous sites within coding sequences, averaged for genes within each co-expression module as a function of average module expression. Correlation across modules: module mean  $\pi_{\text{nonsynonymous}} \times$  average expression Spearman  $\rho = -0.92$ ,  $P < 0.0001$ ;  $\pi_{\text{nonsynonymous}} \times$  ENC  $\rho = 0.418$ ,  $P = 0.048$ ; module mean  $\pi \times$  average expression Spearman  $\rho$ ,  $\rho_{\text{upstream}} = -0.72$ ,  $P < 0.0001$ ;  $\rho_{\text{downstream}} = -0.77$ ,  $P < 0.0001$ ;  $\rho_{\text{intronic}} = -0.54$ ,  $P < 0.0082$ . Points are labeled and colored with module name as in Figure 3 of the main text.



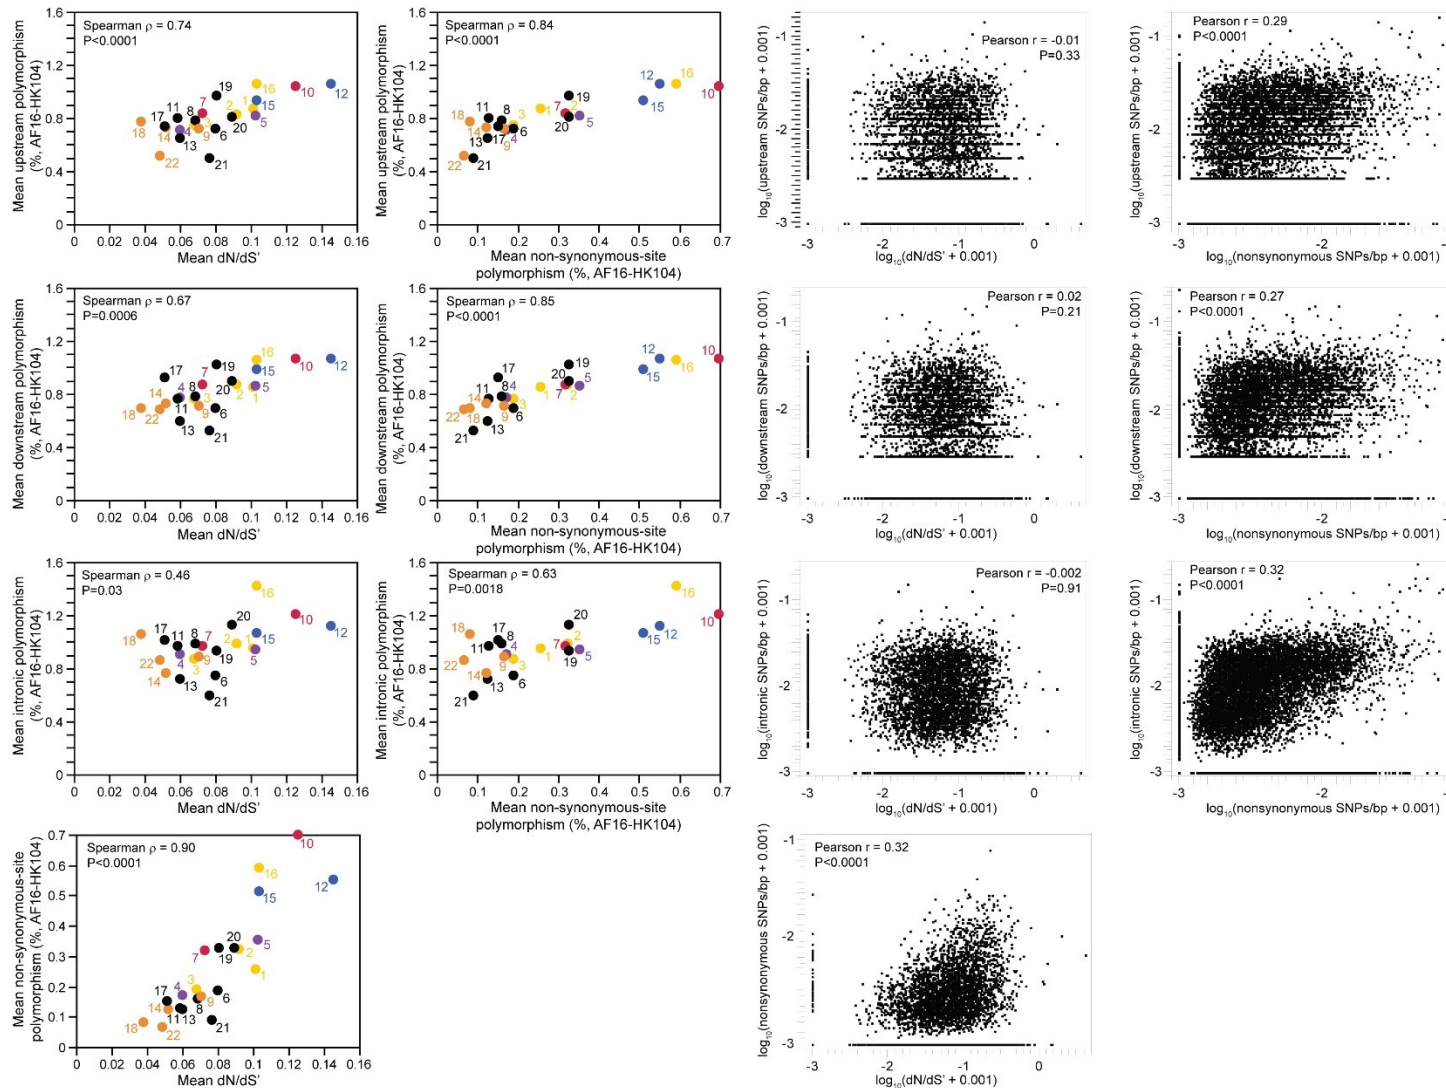

1012  
1013  
1014  
1015  
1016

**Supplementary Figure S6.** SNP density in upstream, downstream, and intronic non-coding locations of genes and at non-synonymous sites within coding sequences, averaged for genes within each co-expression module (left panels) or per gene (right panels) as a function of average module interspecies divergence ( $dN/dS'$ ) or non-synonymous site substitution. Modules are labeled and colored as in Figure 3 of the main text.
